## Multi-omic analysis along the gut-brain axis points to a functional architecture of autism

James T. Morton<sup>1,2</sup>, Dong-Min Jin<sup>3</sup>, Robert H. Mills<sup>4</sup>, Yan Shao<sup>5</sup>, Gibraan Rahman<sup>6, 7</sup>, Daniel McDonald<sup>7</sup>, Kirsten Berding<sup>8</sup>, Brittany D. Needham<sup>9</sup>, María Fernanda Zurita<sup>10</sup>, Maude David<sup>11</sup>, Olga V. Averina<sup>12</sup>, Alexey S. Kovtun<sup>12, 13</sup>, Antonio Noto<sup>14</sup>, Michele Mussap<sup>15</sup>, Mingbang Wang<sup>16</sup>, Daniel N. Frank<sup>17</sup>, Ellen Li<sup>18</sup>, Wenhao Zhou<sup>16</sup>, Vassilios Fanos<sup>19</sup>, Valery N. Danilenko<sup>12</sup>, Dennis P. Wall<sup>20</sup>, Paúl Cárdenas<sup>21</sup>, Manuel E. Baldeón<sup>22</sup>, Ramnik J. Xavier<sup>23, 24, 25</sup>, Sarkis K. Mazmanian<sup>9</sup>, Rob Knight<sup>7, 26, 27</sup>, Jack A. Gilbert<sup>7, 28</sup>, Sharon M. Donovan<sup>8</sup>, Trevor D. Lawley<sup>5</sup>, Bob Carpenter<sup>1</sup>, Richard Bonneau<sup>1, 3, 29</sup>, and Gaspar Taroncher-Oldenburg<sup>2</sup>

<sup>1</sup>Center for Computational Biology, Flatiron Institute, Simons Foundation, New York, NY, USA

<sup>2</sup>The Simons Foundation Autism Research Initiative, Simons Foundation, New York, NY, USA

<sup>3</sup>Center for Genomics and Systems Biology, Department of Biology, New York University, New York, NY, USA

<sup>4</sup>Precidiag Inc, Watertown, MA, USA

<sup>5</sup>Host-Microbiota Interactions Laboratory, Wellcome Sanger Institute, Hinxton, UK

<sup>6</sup>Bioinformatics and Systems Biology Program, University of California San Diego, San Diego, CA, USA

<sup>7</sup>Department of Pediatrics, School of Medicine, University of California San Diego, San Diego, CA, USA

<sup>8</sup>Division of Nutritional Sciences, University of Illinois, Urbana, IL, USA

<sup>9</sup>Division of Biology & Biological Engineering, California Institute of Technology, Pasadena, CA, USA

<sup>10</sup>Microbiology Institute and Health Science College, Universidad San Francisco de Quito, Quito, Ecuador

<sup>11</sup>Departments of Microbiology & Pharmaceutical Sciences, Oregon State University, Corvallis, OR, USA

<sup>12</sup>Vavilov Institute of General Genetics Russian Academy of Sciences, Moscow, Russia

<sup>13</sup>Skolkovo Institute of Science and Technology, Skolkovo, Russia

<sup>14</sup>Department of Biomedical Sciences, School of Medicine, University of Cagliari, Cagliari, Italy

<sup>15</sup>Laboratory Medicine, Department of Surgical Sciences, School of Medicine, University of Cagliari, Italy

<sup>16</sup>Children's Hospital of Fudan University, National Center for Children's Health, Shanghai, China

<sup>17</sup>Department of Medicine, University of Colorado Anschutz Medical Campus, Aurora, CO, USA

<sup>18</sup>Department of Medicine, Division of Gastroenterology and Hepatology, Stony Brook University, Stony Brook, NY, USA

<sup>19</sup>Neonatal Intensive Care Unit and Neonatal Pathology, Department of Surgical Sciences, School of Medicine, University of Cagliari, Italy

<sup>20</sup>Pediatrics (Systems Medicine), Biomedical Data Science, and Psychiatry and Behavioral Sciences, Stanford University, Stanford, CA, USA

<sup>21</sup>Institute of Microbiology, COCIBA, Universidad San Francisco de Quito, Quito, Ecuador

<sup>22</sup>Facultad de Ciencias Médicas, de la Salud y la Vida, Universidad Internacional del Ecuador, Quito, Ecuador

<sup>23</sup>Broad Institute of MIT and Harvard, Cambridge, MA, USA

<sup>24</sup>Department of Molecular Biology, Massachusetts General Hospital, Boston, MA, USA

<sup>25</sup>Center for the Study of Inflammatory Bowel Disease, Massachusetts General Hospital, Boston, MA, USA

<sup>26</sup>Department of Computer Science and Engineering, University of California, San Diego, La Jolla, California, USA

<sup>27</sup>Department of Bioengineering, University of California San Diego, La Jolla, California, USA

<sup>28</sup>Scripps Institution of Oceanography, UC San Diego, La Jolla, CA, USA

<sup>8</sup>Division of Nutritional Sciences, University of Illinois, Urbana, IL, USA

<sup>29</sup>Prescient Design, a Genentech Accelerator, New York, NY, USA

Author Information : These authors contributed equally : James T. Morton, Gaspar Taroncher-Oldenburg  
Corresponding authors : Correspondence to James T. Morton or Gaspar Taroncher-Oldenburg

## Acknowledgements

We would like to thank Allan Packer, Paul Wang, Natalia Volfovsky, Kelsey Martin and John Spiro for their critical review of the manuscript. We'd also like to add Kevin Liu, Hannah Sherman and Xue-Jun Kong for insightful discussions. Y.S. and T.D.L. are supported by the Wellcome Trust (WT098051).

## Contributions

J.T.M. and G.T.-O. conceived and designed the study, developed the software, analyzed the data, interpreted the results and wrote the manuscript; R.B. contributed to study design, data analysis, result interpretation and manuscript editing; R.H.M. contributed to study design, data analysis and manuscript editing; R.J.X. and S.K.M. contributed to study design and manuscript editing; G.R. and B.C. contributed to software development and manuscript editing; D.-M.J. and Y.S. contributed to data analysis and manuscript editing; K.B., B.D.N., M.F.Z., M.D., O.V.A., A.S.K., A.N., M.M., M.W., D.N.F., E.L., W.Z., V.F., V.N.D., D.P.W., M.E.B., R.K., J.G., S.M.D. and T.D.L. provided access to data and contributed to manuscript editing.

## Conflict of Interest

- 1 R.H.M. is Scientific Director at Precidiag Inc.; T.D.L. is co-founder and Chief Scientific Officer of Microbi-
- 2 otica; S.K.M. is a co-founder and has equity in Axial Therapeutics; R.B. is currently Executive Director of
- 3 Prescient Design, a Genentech Accelerator; G.T.-O. is a Consultant-in-Residence at the Simons Foundation.

## 4 Abstract

5 Autism is a highly heritable neurodevelopmental disorder characterized by heterogeneous cognitive, behav-  
6 ioral and communication impairments. Disruption of the gut-brain axis (GBA) has been implicated in  
7 autism, with dozens of cross-sectional microbiome and other omic studies revealing autism-specific profiles  
8 along the GBA albeit with little agreement in composition or magnitude. To explore the functional architec-  
9 ture of autism, we developed an age and sex-matched Bayesian differential ranking algorithm that identified  
10 autism-specific profiles across 10 cross-sectional microbiome datasets and 15 other omic datasets, including  
11 dietary patterns, metabolomics, cytokine profiles, and human brain expression profiles. The analysis uncov-  
12 ered a highly significant, functional architecture along the GBA that encapsulated the overall heterogeneity  
13 of autism phenotypes. This architecture was determined by autism-specific amino acid, carbohydrate and  
14 lipid metabolism profiles predominantly encoded by microbial species in the genera *Prevotella*, *Enterococ-*  
15 *cus*, *Bifidobacterium*, and *Desulfovibrio*, and was mirrored in brain-associated gene expression profiles and  
16 restrictive dietary patterns in individuals with autism. Pro-inflammatory cytokine profiling and virome asso-  
17 ciation analysis further supported the existence of an autism-specific architecture associated with particular  
18 microbial genera. Re-analysis of a longitudinal intervention study in autism recapitulated the cross-sectional  
19 profiles, and showed a strong association between temporal changes in microbiome composition and autism  
20 symptoms. Further elucidation of the functional architecture of autism, including of the role the microbiome  
21 plays in it, will require deep, multi-omic longitudinal intervention studies on well-defined stratified cohorts  
22 to support causal and mechanistic inference.

## 23 Introduction

24 Autism spectrum disorder (ASD) encompasses a broad range of neurodevelopmental conditions defined by  
25 heterogeneous cognitive, behavioral and communication impairments that manifest early in childhood [1]. To  
26 date, over a hundred genes have been identified as putatively associated with ASD, with some genotypes now  
27 having a standardized clinical diagnosis [2]. However, most of the genetic variants are still associated with  
28 heterogeneous phenotypes, making it difficult to identify molecular mechanisms that might be responsible for  
29 particular impairments [3]. Some studies have also looked at the presence of abnormalities in different brain  
30 regions in children with ASD [4, 5]. However, whether such neuroanatomical features could mechanistically  
31 determine autism, and whether environmental factors could induce analogous ASD-like symptoms, remains  
32 unresolved [1].

33 In addition to risk factors, one comorbidity that has been linked to ASD with high confidence is the  
34 occurrence of gastrointestinal (GI) symptoms, such as constipation, diarrhea, or abdominal bloating, but  
35 causal insights remain elusive [6, 7, 8]. Mechanistically, much research has been focused on the interplay  
36 between the GI system and processes controlled by the neuroendocrine, neuroimmune, and autonomous  
37 nervous systems, all of which converge around the GI tract and together modulate the gut-brain axis (GBA)  
38 [9, 10, 11].

39 The GBA facilitates bidirectional communication between the gut and the brain, contributing to brain  
40 homeostasis and helping regulate cognitive and emotional functions [9, 12]. Over the past decade, research  
41 on the factors modulating the GBA has revealed the central role played by the gut microbiome—the trillions  
42 of microbes that colonize the gut—in regulating neuroimmune networks, modifying neural networks, and  
43 directly communicating with the brain [13]. Dysregulation of the gut microbiome and the ensuing disruption  
44 of the GBA are thought to contribute to the pathogenesis of neurodevelopmental disorders including autism,  
45 but the underlying mechanisms and the extent to which the microbiome explains these dynamics is still  
46 unknown [14, 15, 16, 17].

47 Several dozen autism gut metagenomics studies have revealed many, albeit inconsistent, variations in  
48 microbial diversity in individuals with ASD compared with neurotypical individuals [18, 19, 17]. Similarly,  
49 metagenome-based functional reconstructions and metabolic analyses have also shown strong, albeit incon-  
50 clusive differences between ASD and neurotypical individuals [20, 21, 22]. Comparative analyses at other  
51 omic levels have further shown little agreement across studies [23] raising the question of whether the re-  
52 sults obtained so far reflect intrinsic biological differences among cohorts, insufficient statistical power, or  
53 experimental biases that preclude meaningful comparisons [24].

54 A wide range of factors could explain the disagreement across studies, including confounding variation  
55 due to batch effects, the application of inappropriate statistical methodologies, and the vast phenotypic  
56 and genotypic heterogeneity of ASD. Batch effects can be caused by many factors including misspecified  
57 experimental designs, technical variability, geographical location, and demographic composition, and several  
58 algorithms have been proposed to correct for them, but a lack of standardized statistical methods further  
59 complicates interpretation [25, 26, 27, 28]. Microbiome datasets, like other omic datasets, are compositional,  
60 and failure to account for the compositional nature of sequencing counts can lead to high false positive and  
61 false negative rates when identifying differentially abundant microbes [29, 30, 31]. Microbiome analysis in  
62 ASD is further confounded by the phenotypic and genotypic heterogeneity of the disorder, which is known to  
63 be critical for stratifying ASD subtypes and constructing reliable diagnostics but is typically not measured  
64 or controlled for [32, 33, 1].

65 Understanding functional architecture—the network of interactions among different omic levels that  
66 determines individual phenotypes—of complex neurodevelopmental disorders such as autism, requires an  
67 accurate and comprehensive characterization of the different omic levels contributing to it [34]. Traditionally  
68 focused on the human genomic, metabolic, and cellular components of phenotype determination, mounting  
69 evidence of the role the GBA plays in phenotype determination through bidirectional modulatory mechanisms  
70 raises the need for considering the metagenomic and metabolic contributions of the microbiome as potential  
71 key components of the functional architecture of autism [35, 36].

To identify autism-specific omic profiles while reducing cohort-specific confounding factors, we have devised a Bayesian differential ranking algorithm to estimate a distribution of microbial differentials, or relative log-fold changes, [31] across multiple potential ASD subtypes implicit in 25 omic datasets (Table 1). A key feature of this approach was to match individual study participants by sex and age within each study to adjust for confounders in childhood development and cohort-specific batch effects. The preponderance of autism among males is well documented and several potentially sex-dependent mechanisms to explain this phenomenon have been proposed [37]. Furthermore, the development of the microbiome during childhood is a hallmark of microbiome dynamics in the human gut [38, 39, 40, 41, 42]. Our analysis provides insights into the complexity of the interplay among multiple omic levels in ASD, highlights the inherent limitations of cross-sectional studies for understanding the functional architecture of autism, and provides a framework for further studies aimed at better defining the causal relationship between the microbiome and other omic levels and ASD.

## Results

The structure of our analysis consisted of a multi-cohort and multi-omic meta-analysis framework that allowed us to combine independent and dependent omic data sets in one integrated analysis [43, 44]. To minimize issues of compositionality and sequencing depth [45], we modeled overdispersion using a negative binomial distribution for modeling sequencing count data [46] (Box 1 “TACKLING METAGENOMIC UNKNOWN”). Our differential ranking approach incorporated a case-control matching component consisting of individually pairing ASD children with age- and sex-matched neurotypical control children within each study cohort, allowing us to adjust for confounding variation and batch effects (Supplemental methods). Finally, we cross-referenced the 16S-based microbial differential ranking analysis from eight age-sex matched cohorts against 15 other omic datasets to contextualize the potential functional roles these microbes could play in autism (Figure 1).

### Age- and sex-matching increases informational content of cross-sectional ASD datasets

We compared the age- and sex-matched differential ranking analysis to the standard group-averaged differential ranking analysis across eight out of the ten 16S studies [47, 48, 49, 21, 50, 51, 52, 53]. Age- and sex-matched differential analysis outperformed standard group averaging with respect to  $R^2$ , and its overall performance strictly improved as more studies were added (Figure S1). This performance boost reflected a reduction in model uncertainty with larger cohorts that was indicative of overlapping differentially abundant taxa across studies and of reduced confounding variation.

### Global differential ranking analysis reveals a distribution of significant ASD-microbiome associations

A global, age- and sex-matched differential ranking analysis of the eight 16S datasets selected for this study revealed a clear partitioning of microbial differences with respect to ASD and cohort membership (Figure 2a, Figure S2). The distribution of the overall case-control differences showed a strong ASD-specific signal driven by 142 microbes more commonly found in ASD children and 32 microbes more commonly found in their control counterparts (Table S1). The variability observed is most likely due to confounding factors such as cohort demographics and geographic location, with the eight cohorts originating from Asia, Europe, South America, and North America. Analogous global differential ranking trends could be observed for the virome, shotgun metagenomics sequencing (SMS), and RNA-seq datasets (Figure S3). To determine whether these highly significant microbiome signals ( $p$ -value < 0.0025) could be used to distinguish ASD subjects from their age- and sex-matched control counterparts, we trained random forest classifiers on train/validation/test splits on data derived from 16S—targeted sequencing of the microbial 16S ribosomal RNA gene—and SMS—whole genome sequencing of microbial communities. Despite the strong microbiome effect size, we faced difficulties fitting generalizable classifiers. Our best classifiers had an average cross-validation accuracy of about 75% (Figure 2b), falling within the range of 52%–90% classification accuracy observed in previous studies [50, 49, 54]. We suspect that the vast heterogeneity across cohorts hampered classification performance. While cohort size did not impact predictability (Figure 2c), some cohorts with skewed sex ratios or age ranges did exhibit lower classification performance (Figure 2d-e). In the Zurita et al. cohort, sex-specific factors could confound classification (four girls and 56 boys) [48], and in the Kang et al. cohort, age-associated microbiome development factors could hamper classification accuracy (all children were 10 years or older). In addition, all subjects in the Kang et al. cohort had known GI symptoms [55], further compromising classifier performance because none of the other studies controlled for this variable. As a result, and analogous to the phenotypic and genotypic heterogeneity observed in ASD, the microbiome composition of ASD children also exhibits high heterogeneity, precluding the identification of a homogeneous universal ASD microbial profile and the construction of generalizable classifiers.

### Children with ASD exhibit significant individual differences at several omic levels

Differential ranking analysis of three core omic levels—microbiome (16S and SMS) and human transcriptome (RNAseq)—revealed strong and highly significant differences between ASD subjects and their neurotypical

135 counterparts (p-value < 0.0025) (Figure 2f; Table S2; Table S3). Two additional omic levels—the metabolome  
136 and the virome—didn’t show significance signals (Figure S4, Table S4). Amongst the models that yielded a  
137 statistically significant signal, the 16S and SMS datasets had a larger effect size than the RNAseq datasets  
138 (Figure 2f). While each omic dataset by itself showed strong associations with ASD, a side-by-side comparison  
139 of the 16S and SMS datasets—two datasets that should show high equivalence—revealed a significant lack of  
140 overlap between them, highlighting the outstanding challenge of batch effects in microbiome studies (Figure  
141 S5). The reasons for this discrepancy could be many, but most likely center around sample size—our  
142 study looked at eight 16S datasets versus only three SMS datasets containing 754 individuals and 166  
143 individuals, respectively. Another major challenge when estimating species profiles with metagenomics  
144 reference libraries is assigning a species identification to a read—there are many reads that do not uniquely  
145 map to individual species—and as a result, these multi-mapped reads can give rise to numerous false positive  
146 taxa [56, 57, 58, 59]. Based on this, we decided to focus primarily on the 16S datasets to define a global  
147 differential ranking profile.

## 148 Sibling-matching and unrelated sex- and age-matching show significant discrep- 149 ancies

151 To determine whether sex- and age-matched differentials could be universally predictive, we compared the  
152 16S differentials obtained from the age- and sex-matched cohorts with two sibling-matched cohorts [60] [61].  
153 Interestingly, we observed a significant negative correlation between the differentials extracted from the age-  
154 and sex-matched cohort and the two sibling-matched cohorts, suggesting that ASD-specific microbes in the  
155 sibling-matched studies are enriched in the control group in the age- and sex-matched studies and vice versa  
156 (Fig. 2g). Permanova applied to the age-sex matched cohort revealed a strong age-confounder across cohorts  
157 (pvalue < 0.001), with little confounding variation due to sex (Table S5). In contrast, Permanova applied  
158 to these sibling-matched cohorts revealed that household is a major confounder in both cohorts (pvalue <  
159 0.001), but ruled out age as a confounder and indicated that sex was a confounder only in the David et al.  
160 cohort (pvalue < 0.001). The observed discrepancies point to different sets of confounders possibly affecting  
161 the analysis: in the case of the age- and sex-matched studies, family confounders aren’t typically accounted  
162 for, while sibling-matched studies don’t typically adjust for age confounders. In addition, and while cohorts  
163 such as the one studied in Maude et al. specifically control for the possibility, siblings often exhibit a higher  
164 risk of developing ASD compared to the general population [62].

## 165 Host cytokine concentrations are correlated with microbial abundances

166 Immune dysregulation, ranging from circulating ‘anti-brain’ antibodies and perturbed cytokine profiles to  
167 simply having a family history of immune disorders, has been repeatedly associated with ASD [63, 64].  
168 Recently, for example, Zurita et al. showed that concentrations of the inflammatory cytokine transforming  
169 growth factor beta (TGF- $\beta$ ) are significantly elevated in ASD children. We reanalyzed this dataset, after age-  
170 and sex-matching, and observed that microbial differentials associated with TGF- $\beta$  and IL-6 concentrations  
171 were positively correlated with the global microbial log-fold changes between ASD and control pairs (IL-6 :  
172  $r=-0.435$ ,  $p=0$ ; TGF- $\beta$  :  $r=0.291$ ,  $p=0$ ) (Table S6). To validate the integrity of these microbial profiles with  
173 respect to the cytokine changes, we calculated the log-ratios of these microbial abundances and showed them  
174 to, in turn, be highly correlated with TGF- $\beta$  and IL-6 concentrations (IL-6 :  $r=0.50$ ,  $p=0.0007$ ; TGF- $\beta$  :  
175  $r=0.45$ ,  $p=0.002$ ) (Figure 3 a-d).

176 Four clusters of microbial genera—*Prevotella*, *Enterococcus*, *Bifidobacteria*, and *Desulfovibrio*—were pre-  
177 dominantly associated with the cytokine differentials. Partial mechanistic insights on some of these cytokine-  
178 microbe associations have been previously published. Both *B. longum* and *E. faecalis* have shown anti-  
179 inflammatory activities: *B. longum* downregulates IL-6 in fetal human enterocytes in vitro [65] and *E.*  
180 *faecalis* has been observed to upregulate TGF- $\beta$  in human intestinal cells [66]. *P. copri* associations with  
181 different cytokines have also been observed in multiple disease contexts [67]. Similarly, *Bifidobacteria* and  
182 *Prevotella* both co-occurred with phages enriched in ASD or in neurotypical children (Figure S6, Table  
183 S7), but while microbes have previously been reported to mediate viral infections [68, 69], the mechanistic  
184 underpinnings of these interactions with the host’s immunity remain poorly understood [70, 71, 72].

## 185 The microbiome metabolic capacity is reflective of the human brain-associated 186 metabolic capacity in ASD

188 To determine potential crosstalk between the human brain and the microbiome physiology, we compared  
189 the metabolic capacities encoded by the microbial metagenome—combining the individual metabolic capac-  
190 ities of thousands of different microbes—and the differentially expressed human genome in the brain, two  
191 omic levels representing entirely different biological contexts. We observed that over 100 human metabolic  
192 pathways differentially expressed in the brain tissues of ASD individuals had analogous microbial path-  
193 ways differentially abundant in the microbiome of children with ASD, suggesting a potential coordination  
194 of metabolic pathways across omic levels in ASD (Fig. 3e). Pathways related to amino acid metabolism,  
195 carbohydrate metabolism and lipid metabolism were disproportionately represented among the overlapping  
196 genes (Table S8).

## 197 **The microbiome metabolic capacity reflects restrictive diet patterns in children** 198 **with ASD**

199 Autistic traits in early childhood have been shown to correlate with poor diet quality later in life, however,  
200 little is known about how diet quality is directly linked to autistic traits [73]. Here, we re-analyzed the paired  
201 microbiome and dietary survey data from Berding et al.. A microbiome-diet co-occurrence analysis revealed  
202 startlingly similar amino acid, carbohydrate and lipid metabolism association patterns to those observed  
203 in the microbiome-brain metabolic capacity analysis (Table S9). Interestingly, both microbes enriched in  
204 ASD and in control subjects co-occurred primarily with amino acid dietary compounds (Figure 3f, Figure  
205 S7). Autistic children were less likely to consume foods high in glutamic acid, serine, choline, phenylalanine,  
206 leucine, tyrosine, valine and histidine, all compounds involved in neurotransmitter biosynthesis. Even though  
207 the metabolomic analysis did not yield statistically significant signals after FDR correction, the metabolites  
208 that showed the strongest signal included glutamate and phenylalanine, consistent with the microbiome-  
209 diet analysis [74, 75, 76]. Disruptions in the biosynthesis of these neurotransmitter molecules have been  
210 implicated in a wide variety of psychiatric disorders, and a recent blood metabolomics study has shown the  
211 potential of using branched chain amino acids to define autism subtypes [33]. Due to the incompatibility  
212 between the molecular features across datasets, it was not possible to combine any of the metabolomics  
213 datasets to boost the statistical power, which remains a major limitation of metabolomics technologies at  
214 present (see Methods).

## 215 **Differential microbial rankings show disease-specific correlations**

216 One major challenge in determining microbiome-disease associations is identifying correlations specific to a  
217 particular condition and not generally present across diseases [77, 78]. To determine how specific to ASD our  
218 global differential microbiome profile was, we cross-referenced it against differential ranking results obtained  
219 from an Inflammatory Bowel Disorder (IBD) dataset [79] and a Type 1 Diabetes (T1D) dataset [80]. IBD  
220 shares some comorbidities with ASD [81, 82], while no direct correlation between ASD and T1D has been  
221 reported to date. The analysis revealed a notable overlap between microbes enriched in ASD and IBD, and  
222 this overlap was stronger than both the overlap between IBD and T1D and between ASD and T1D (Figure  
223 S8). Whether this ASD-IBD overlap is suggestive of a common microbial profile or is confounded by the  
224 restrictive dietary nature of these two clinical conditions is currently unclear. Higher resolution and properly  
225 designed clinical studies will have to be performed to get to a mechanistic understanding of the potential  
226 microbiome connection between these two conditions.

## 227 **ASD microbiome profiles weaken after fecal matter transplant consistent with** 228 **reported behavioral improvement**

229 While the preceding cross-sectional analyses showed significant associations among several omic levels (vi-  
230rome, microbiome, immunome) or diet and ASD, insights into causality are still limited. By contrast,  
231 longitudinal intervention studies provide an opportunity to obtain stronger insights into causality. To test  
232 this, we re-analyzed data from a two-year, open label fecal matter transplant (FMT) study with 18 children  
233 with ASD [83]. In this study, the children were subjected to a two-week antibiotic treatment and a bowel  
234 cleanse followed by two days of high dose FMT treatment and eight weeks of daily maintenance FMT doses.  
235 Based on one of the most common evaluation scales for ASD, the Childhood Autism Rating Scale (CARS),  
236 significant improvements were achieved after the ten week course of treatment. Two months later the initial  
237 gains were largely maintained, and a two-year follow-up showed signs of further improvement in most of the  
238 patients. The results are consistent with a potential role of the microbiome in improving autism symptoms,  
239 but how the underlying changes in microbiome composition related to those seen in other studies remained  
240 unknown.

241 Here, we re-analyzed the original raw data in the context of the ASD profiles revealed by our cross-  
242 sectional differential ranking analysis (Table S10). All microbes associated with ASD in the 18 children prior  
243 to the FMT treatment had been identified as ASD-associated microbes in our age- and sex-matched cross-  
244 sectional analysis, recapitulating 74% of the cross-sectional profile. Immediately following FMT treatment,  
245 the abundances of the ASD-associated microbes decreased in all 8 children (Figure 4). The two-year follow-  
246 up analysis revealed that all the ASD-associated microbes, mostly *Enterococcaceae*, continued to be depleted.  
247 Consistent with the findings of Kang et al., we also observed *Desulfovibrio sp.*, and *P. copri* increase over  
248 the two year period, while *Bifidobacteria sp.* could be found both among depleted and enriched species and  
249 other *Prevotella sp.* were depleted, pointing to a potentially wide functional diversity within these genera  
250 not noted in the original study.

## 251 **Discussion**

252 The functional architecture of ASD, and in particular the potential role the microbiome plays in modulating  
253 the GBA in the context of autism, remains poorly understood due to disagreements among existing micro-  
254 biome and other omic studies. Our Bayesian model highlighted a distribution of highly significant microbial  
255 differentials obtained from individual age- and sex-pairings between children with ASD and neurotypicals,  
256 and parallel analyses at the immunome, human transcriptome, and dietome levels revealed strong associ-  
257 ations among omic levels. The virome and the direct metabolome signals, while present, were markedly  
258 weaker than the other omic signals. The inferred ASD-specific metabolic profiles from the microbiome and  
259 the human transcriptome, on the other hand, showed a high and significant degree of overlap in microbial  
260 and human pathways expressed in the gut and in the brain, respectively. The metabolic connection implied  
261 by this overlap, which included differentially enriched carbohydrate and amino acid metabolic pathways in

262 ASD, is a remarkable observation given the fundamental difference between the gut and brain physiologies,  
263 which would a priori suggest a reduced overlap in metabolic capacities. The microbiome-diet co-occurrence  
264 analysis also highlighted a reduced intake of amino acids and carbohydrates linked to specific microbiome  
265 profiles in ASD children. These metabolic and dietary imbalances, particularly regarding glutamate levels,  
266 were further apparent, albeit weakly, in the serum, fecal and urine metabolomes we analyzed. This multi-  
267 scale overlap we observed along the GBA points to the existence of a functional architecture of ASD driven  
268 by the metabolic potential at the genomic and metagenomic levels.

269 While the differential distributions we determined were highly significant, the global analysis did not  
270 provide reliable ASD classifiers or uncover universal microbial ‘smoking guns’ linked to autism. However,  
271 several microorganisms consistently detected across omic levels pointed to potentially interesting functional  
272 connections. For example, our analysis suggested that *B. longum* exhibited a down-regulation of IL-6, which  
273 has been observed across a number of in vitro and cohort studies [84, 85]. The diet co-occurrence analysis also  
274 showed a strong association between *P. copri* and carbohydrate depletion in ASD. The population dynamics  
275 of *P. copri* have been reported to be driven primarily by carbohydrates in the diet [67]. Multiple other  
276 microbes, including several *Bifidobacteria*, *Enterococcus* and *Desulfovibrio* species, stood out in the immune  
277 and viral analyses. In the FMT study, the relative proportions of several *Prevotella*, *Bifidobacteria*, *Desul-*  
278 *fovibrio* and *Enterococcus* species also showed strong associations with ASD symptoms, further suggesting  
279 a causal role for these microorganisms in shaping autism symptoms.

280 Despite our inability to determine actual metabolomic profiles at this point (see Methods), our metabolite  
281 analysis based on microbiome- and brain-derived metabolite inferences as well as the diet-derived metabolite  
282 data reveals a picture of a unifying and distinct ASD functional architecture. With the brain, the immunome  
283 and diet as major effectors, the multi-factorial complexity of ASD is reduced to a multi-scale set of inter-  
284 actions centered around human and bacterial metabolism that in turn determines phenotypic, genomic and  
285 metagenomic attributes via multiple feedback loops (Figure 5). The association of specific genotypes with  
286 ASD has been clearly established [2]; the pivotal role of the immune system in mediating the communication  
287 between the gut microbiome and the human brain as well as other peripheral systems is also firmly estab-  
288 lished [86]; further, the central role of the microbiome in mediating diet-derived nutrient mobilization has  
289 been extensively documented [87]; and several hard-wired feedback loops among these effectors such as the  
290 hypothalamus-mediated regulation of appetite and diet, have also been described [10].

291 A major limitation of our meta-analysis is the lack of consistent behavioral, genotypic or electronic  
292 healthcare record data that would have allowed subtyping of the ASD subjects in light of environmental  
293 confounders. Furthermore, we cannot definitely recommend age- and sex-matching over sibling matching  
294 based on our analysis. Age remains a major confounding factor in early childhood microbiome development  
295 and controlling for this is key for understanding microbial fluctuations [88]. On the other hand, sibling-  
296 matching may help control environmental factors, but mostly rules out the ability to age-match subjects,  
297 thus potentially introducing the age confounder [89]. And while our approach revealed strong associations  
298 among the microbiome, other omic levels, and ASD, the vast heterogeneity in behavioral patterns and in  
299 genotypes is a major obstacle in constructing diagnostics and treatments for ASD symptoms [90, 32].

300 Our analysis has further exposed the limitations of cross-sectional cohort studies and the need for lon-  
301 gitudinal intervention studies to further our understanding of the functional architecture of ASD. Building  
302 realistic causal models of autism needs to take into account the multi-factorial complexity underlying differ-  
303 ent ASD subtypes, which will require a concerted effort to simultaneously analyze several omic levels and at  
304 clinically relevant time scales. For instance, understanding the engraftment dynamics of FMT and its func-  
305 tional implications on the recipients’ gut microbiomes requires frequent initial sampling of the microbiome,  
306 immunome and metabolome, but tracing any behavioral changes over time requires less frequent sampling  
307 over periods of up to several years in combination with reliable behavioral, medical and dietary surveys  
308 [91, 92]. Collecting and integrating such multi-scale omic datasets presents unique logistical and analytical  
309 challenges.

310 Managing data acquisition and access will require coordinating multiple sites and potentially centralizing  
311 some aspects of sample processing. Recent initiatives such as The Environmental Determinants of Diabetes in  
312 the Young (TEDDY) study, an international long-term, multi-center initiative to link specific environmental  
313 triggers to particular Type 1 diabetes-associated genotypes, provide a blueprint for similar approaches in  
314 ASD [93]. A key component of such an initiative would be the establishment of standardized sampling  
315 and processing protocols that would minimize technical confounders, one of the top confounders at most  
316 omic levels. For instance, our analysis showed major batch effects when comparing 16S and SMS datasets  
317 across cohorts ( $r=-0.023$ ,  $p=0.48$ , Figure S5b) as well as within a cohort ( $r=0.17$ ,  $p=1e-5$ , Figure S5b). And  
318 while there are extensive efforts underway to calibrate microbiome datasets [94], other omic levels such as  
319 the metabolome [26] present even more fundamental technical issues that make it imperative to develop  
320 concerted strategies to be able to include them in an integrated analysis.

321 In addition to the considerable variations in statistical properties across datasets, interactions among  
322 omic levels are mostly underdetermined, making the construction of informative models a major challenge.  
323 Determining the necessary biologically relevant and unbiased assumptions is a non-trivial process and can  
324 inadvertently lead to model mis-specifications resulting in misleading conclusions. As pointed out recently  
325 for genetic, environmental and microbiome models in ASD [95, 96], addressing these issues will be critical  
326 to inferring causal mechanisms from population-scale studies. In addition, and given the vast heterogeneity  
327 of ASD, designing cohort studies that minimize confounding factor effects will be key to furthering our  
328 understanding of autism. For example, while our analysis could not identify ASD subtypes implicated in GI  
329 symptoms, we have determined stronger associations between gut microbes, host immunity, brain expression  
330 and dietary patterns than previously reported, highlighting the potential for boosting the statistical power  
331 and biological insight with comprehensive omic analyses. We conclude that multi-omic longitudinal inter-  
332 vention studies on appropriately stratified cohorts, in combination with comprehensive patient metadata,  
333 provide an optimal approach to advance our understanding of the etiology of autism to the next level.

## References

- 334
- 335 [1] Catherine Lord, Traolach S Brugha, Tony Charman, James Cusack, Guillaume Dumas, Thomas Fra-  
336 zier, Emily J H Jones, Rebecca M Jones, Andrew Pickles, Matthew W State, Julie Lounds Taylor,  
337 and Jeremy Veenstra-VanderWeele. Autism spectrum disorder. *Nat Rev Dis Primers*, 6(1):5, January  
338 2020.
- 339 [2] F Kyle Satterstrom, Jack A Kosmicki, Jiebiao Wang, Michael S Breen, Silvia De Rubeis, Joon-Yong  
340 An, Minshi Peng, Ryan Collins, Jakob Grove, Lambertus Klei, Christine Stevens, Jennifer Reichert,  
341 Maureen S Mulhern, Mykyta Artomov, Sherif Gerges, Brooke Sheppard, Xinyi Xu, Aparna Bhaduri,  
342 Utku Norman, Harrison Brand, Grace Schwartz, Rachel Nguyen, Elizabeth E Guerrero, Caroline  
343 Dias, Autism Sequencing Consortium, iPSYCH-Broad Consortium, Catalina Betancur, Edwin H Cook,  
344 Louise Gallagher, Michael Gill, James S Sutcliffe, Audrey Thurm, Michael E Zwick, Anders D Børglum,  
345 Matthew W State, A Ercument Cicek, Michael E Talkowski, David J Cutler, Bernie Devlin, Stephan J  
346 Sanders, Kathryn Roeder, Mark J Daly, and Joseph D Buxbaum. Large-Scale exome sequencing study  
347 implicates both developmental and functional changes in the neurobiology of autism. *Cell*, 180(3):568–  
348 584.e23, February 2020.
- 349 [3] Lilia M Iakoucheva, Alysson R Muotri, and Jonathan Sebat. Getting to the cores of autism. *Cell*,  
350 178(6):1287–1298, September 2019.
- 351 [4] Cynthia Mills Schumann, Julia Hamstra, Beth L Goodlin-Jones, Linda J Lotspeich, Hower Kwon,  
352 Michael H Buonocore, Cathy R Lammers, Allan L Reiss, and David G Amaral. The amygdala is  
353 enlarged in children but not adolescents with autism; the hippocampus is enlarged at all ages. *Journal*  
354 *of neuroscience*, 24(28):6392–6401, 2004.
- 355 [5] Cynthia Mills Schumann and David G Amaral. Stereological analysis of amygdala neuron number in  
356 autism. *Journal of Neuroscience*, 26(29):7674–7679, 2006.
- 357 [6] Radu Lefter, Alin Ciobica, Daniel Timofte, Carol Stanciu, and Anca Trifan. A descriptive review  
358 on the prevalence of gastrointestinal disturbances and their multiple associations in autism spectrum  
359 disorder. *Medicina*, 56(1):11, December 2019.
- 360 [7] Amirhossein Modabbernia, Eva Velthorst, and Abraham Reichenberg. Environmental risk factors for  
361 autism: an evidence-based review of systematic reviews and meta-analyses. *Mol. Autism*, 8:13, March  
362 2017.
- 363 [8] Elaine Y Hsiao. Gastrointestinal issues in autism spectrum disorder. *Harv. Rev. Psychiatry*, 22(2):104,  
364 2014.
- 365 [9] Emeran A Mayer. Gut feelings: the emerging biology of gut–brain communication. *Nat. Rev. Neurosci.*,  
366 12(8):453–466, July 2011.
- 367 [10] Livia H Morais, Henry L Schreiber, 4th, and Sarkis K Mazmanian. The gut microbiota-brain axis in  
368 behaviour and brain disorders. *Nat. Rev. Microbiol.*, 19(4):241–255, April 2021.
- 369 [11] John F Cryan, Kenneth J O’Riordan, Kiran Sandhu, Veronica Peterson, and Timothy G Dinan. The  
370 gut microbiome in neurological disorders. *Lancet Neurol.*, 19(2):179–194, February 2020.
- 371 [12] Amar Sarkar, Siobhán Harty, Katerina V-A Johnson, Andrew H Moeller, Rachel N Carmody, Soili M  
372 Lehto, Susan E Erdman, Robin I M Dunbar, and Philip W J Burnet. The role of the microbiome in  
373 the neurobiology of social behaviour. *Biol. Rev. Camb. Philos. Soc.*, 95(5):1131–1166, October 2020.
- 374 [13] Amanda Jacobson, Daping Yang, Madeleine Vella, and Isaac M Chiu. The intestinal neuro-immune  
375 axis: crosstalk between neurons, immune cells, and microbes. *Mucosal Immunol.*, 14(3):555–565,  
376 February 2021.
- 377 [14] Sue Grenham, Gerard Clarke, John F Cryan, and Timothy G Dinan. Brain–Gut–Microbe communi-  
378 cation in health and disease. *Front. Physiol.*, 0, 2011.
- 379 [15] The Microbiome-Gut-Brain axis in health and disease. *Gastroenterol. Clin. North Am.*, 46(1):77–89,  
380 March 2017.
- 381 [16] Yoko M Ambrosini, Dana Borchering, Anumantha Kanthasamy, Hyun Jung Kim, Auriel A Willette,  
382 Albert Jergens, Karin Allenspach, and Jonathan P Mochel. The Gut-Brain axis in neurodegenerative  
383 diseases and relevance of the canine model: A review. *Front. Aging Neurosci.*, 0, 2019.
- 384 [17] Mingyu Xu, Xuefeng Xu, Jijun Li, and Fei Li. Association between gut microbiota and autism spectrum  
385 disorder: A systematic review and Meta-Analysis. *Front. Psychiatry*, 10:473, July 2019.
- 386 [18] Pedro Andreo-Martínez, María Rubio-Aparicio, Julio Sánchez-Meca, Alejandro Veas, and  
387 Agustín Ernesto Martínez-González. A meta-analysis of gut microbiota in children with autism. *J.*  
388 *Autism Dev. Disord.*, May 2021.
- 389 [19] Navya Bezawada, Tze Hui Phang, Georgina L Hold, and Richard Hansen. Autism spectrum disorder  
390 and the gut microbiota in children: A systematic review. *Ann. Nutr. Metab.*, 76(1):16–29, January  
391 2020.

- 392 [20] Narueporn Likhitweerawong, Chanisa Thonusin, Nonglak Boonchooduang, Orawan Louthrenoo,  
393 Intawat Nookaew, Nipon Chattapakorn, and Siriporn C Chattapakorn. Profiles of urine and blood  
394 metabolomics in autism spectrum disorders. *Metab. Brain Dis.*, August 2021.
- 395 [21] Jiang Zhu, Xueying Hua, Ting Yang, Min Guo, Qiu Li, Lu Xiao, Ling Li, Jie Chen, and Tingyu Li.  
396 Alterations in gut vitamin and amino acid metabolism are associated with symptoms and neurodevel-  
397 opment in children with autism spectrum disorder. *J. Autism Dev. Disord.*, July 2021.
- 398 [22] Xin-Jie Xu, Xiao-E Cai, Fan-Chao Meng, Tian-Jia Song, Xiao-Xi Wang, Yi-Zhen Wei, Fu-Jun Zhai,  
399 Bo Long, Jun Wang, Xin You, and Rong Zhang. Comparison of the metabolic profiles in the plasma and  
400 urine samples between autistic and typically developing boys: A preliminary study. *Front. Psychiatry*,  
401 12:657105, June 2021.
- 402 [23] Atiqah Azhari, Farouq Azizan, and Gianluca Esposito. A systematic review of gut-immune-brain  
403 mechanisms in autism spectrum disorder. *Dev. Psychobiol.*, 61(5):752–771, July 2019.
- 404 [24] Patrick D Schloss. Identifying and overcoming threats to reproducibility, replicability, robustness, and  
405 generalizability in microbiome research. *MBio*, 9(3), June 2018.
- 406 [25] Yiwen Wang and Kim-Anh LêCao. Managing batch effects in microbiome data. *Brief. Bioinform.*,  
407 21(6):1954–1970, December 2020.
- 408 [26] Wei Han and Liang Li. Evaluating and minimizing batch effects in metabolomics. *Mass Spectrom.*  
409 *Rev.*, November 2020.
- 410 [27] Hoa Thi Nhu Tran, Kok Siong Ang, Marion Chevrier, Xiaomeng Zhang, Nicole Yee Shin Lee, Michelle  
411 Goh, and Jinnmiao Chen. A benchmark of batch-effect correction methods for single-cell RNA sequenc-  
412 ing data. *Genome Biol.*, 21(1):12, January 2020.
- 413 [28] Jelena Čuklina, Patrick G A Pedrioli, and Ruedi Aebersold. Review of batch effects prevention,  
414 diagnostics, and correction approaches. *Methods Mol. Biol.*, 2051:373–387, 2020.
- 415 [29] Gregory B Gloor, Jia Rong Wu, Vera Pawlowsky-Glahn, and Juan José Egozcue. It’s all relative:  
416 analyzing microbiome data as compositions. *Ann. Epidemiol.*, 26(5):322–329, May 2016.
- 417 [30] Doris Vandeputte, Gunter Kathagen, Kevin D’hoë, Sara Vieira-Silva, Mireia Valles-Colomer, João  
418 Sabino, Jun Wang, Raul Y Tito, Lindsey De Commer, Youssef Darzi, Séverine Vermeire, Gwen Falony,  
419 and Jeroen Raes. Quantitative microbiome profiling links gut community variation to microbial load.  
420 *Nature*, 551(7681):507–511, November 2017.
- 421 [31] James T Morton, Clarisse Marotz, Alex Washburne, Justin Silverman, Livia S Zaramela, Anna Edlund,  
422 Karsten Zengler, and Rob Knight. Establishing microbial composition measurement standards with  
423 reference frames. *Nat. Commun.*, 10(1):2719, June 2019.
- 424 [32] Yuan Luo, Alal Eran, Nathan Palmer, Paul Avillach, Ami Levy-Moonshine, Peter Szolovits, and Isaac S  
425 Kohane. A multidimensional precision medicine approach identifies an autism subtype characterized  
426 by dyslipidemia. *Nat. Med.*, 26(9):1375–1379, September 2020.
- 427 [33] Alan M Smith, Joseph J King, Paul R West, Michael A Ludwig, Elizabeth L R Donley, Robert E  
428 Burrier, and David G Amaral. Amino acid dysregulation metabotypes: Potential biomarkers for  
429 diagnosis and individualized treatment for subtypes of autism spectrum disorder. *Biol. Psychiatry*,  
430 85(4):345–354, February 2019.
- 431 [34] Patrick F Sullivan and Daniel H Geschwind. Defining the genetic, genomic, cellular, and diagnostic  
432 architectures of psychiatric disorders. *Cell*, 177(1):162–183, 2019.
- 433 [35] Ran Blekhman, Julia K Goodrich, Katherine Huang, Qi Sun, Robert Bukowski, Jordana T Bell,  
434 Timothy D Spector, Alon Keinan, Ruth E Ley, Dirk Gevers, et al. Host genetic variation impacts  
435 microbiome composition across human body sites. *Genome biology*, 16(1):1–12, 2015.
- 436 [36] Braden T Tierney, Yingxuan Tan, Aleksandar D Kostic, and Chirag J Patel. Gene-level metagenomic  
437 architectures across diseases yield high-resolution microbiome diagnostic indicators. *Nature communi-*  
438 *cations*, 12(1):1–12, 2021.
- 439 [37] Sarah L Ferri, Ted Abel, and Edward S Brodtkin. Sex differences in autism spectrum disorder: a review.  
440 *Curr. Psychiatry Rep.*, 20(2):9, March 2018.
- 441 [38] Maria Gloria Dominguez-Bello, Filipa Godoy-Vitorino, Rob Knight, and Martin J Blaser. Role of the  
442 microbiome in human development. *Gut*, 68(6):1108–1114, June 2019.
- 443 [39] Marie-Claire Arrieta, Leah T Stiemsma, Nelly Amenyogbe, Eric M Brown, and Brett Finlay. The  
444 intestinal microbiome in early life: health and disease. *Front. Immunol.*, 5:427, September 2014.
- 445 [40] Gwen Falony, Marie Joossens, Sara Vieira-Silva, Jun Wang, Youssef Darzi, Karoline Faust, Alexan-  
446 der Kurilshikov, Marc Jan Bonder, Mireia Valles-Colomer, Doris Vandeputte, Raul Y Tito, Samuel  
447 Chaffron, Leen Rymenans, Chloë Verspecht, Lise De Sutter, Gipsi Lima-Mendez, Kevin D’hoë, Karl  
448 Jonckheere, Daniel Homola, Roberto Garcia, Etti F Tigchelaar, Linda Eeckhaudt, Jingyuan Fu, Lies-  
449 bet Henckaerts, Alexandra Zhernakova, Cisca Wijmenga, and Jeroen Raes. Population-level analysis  
450 of gut microbiome variation. *Science*, 352(6285):560–564, April 2016.



- 451 [41] Tanya Yatsunenکو, Federico E Rey, Mark J Manary, Indi Trehan, Maria Gloria Dominguez-Bello,  
452 Monica Contreras, Magda Magris, Glida Hidalgo, Robert N Baldassano, Andrey P Anokhin, Andrew C  
453 Heath, Barbara Warner, Jens Reeder, Justin Kuczynski, J Gregory Caporaso, Catherine A Lozupone,  
454 Christian Lauber, Jose Carlos Clemente, Dan Knights, Rob Knight, and Jeffrey I Gordon. Human gut  
455 microbiome viewed across age and geography. *Nature*, 486(7402):222–227, May 2012.
- 456 [42] Yan Shao, Samuel C Forster, Evdokia Tsaliki, Kevin Vervier, Angela Strang, Nandi Simpson, Nitin  
457 Kumar, Mark D Stares, Alison Rodger, Peter Brocklehurst, Nigel Field, and Trevor D Lawley. Stunted  
458 microbiota and opportunistic pathogen colonization in caesarean-section birth. *Nature*, 574(7776):117–  
459 121, October 2019.
- 460 [43] Adib Shafi, Tin Nguyen, Azam Peyvandipour, Hung Nguyen, and Sorin Draghici. A Multi-Cohort  
461 and Multi-Omics Meta-Analysis framework to identify Network-Based gene signatures. *Front. Genet.*,  
462 10:159, March 2019.
- 463 [44] Alexander Kaefer, Manuel Landesfeind, Kirstin Feussner, Burkhard Morgenstern, Ivo Feussner, and  
464 Peter Meinicke. Meta-analysis of pathway enrichment: combining independent and dependent omics  
465 data sets. *PLoS One*, 9(2):e89297, February 2014.
- 466 [45] Gregory B Gloor, Jean M Macklaim, Vera Pawlowsky-Glahn, and Juan J Egozcue. Microbiome datasets  
467 are compositional: And this is not optional. *Front. Microbiol.*, 8:2224, November 2017.
- 468 [46] Michael I Love, Wolfgang Huber, and Simon Anders. Moderated estimation of fold change and disper-  
469 sion for RNA-seq data with DESeq2. *Genome Biol.*, 15(12):550, 2014.
- 470 [47] Kirsten Berding and Sharon M Donovan. Dietary patterns impact temporal dynamics of fecal micro-  
471 biota composition in children with autism spectrum disorder. *Front Nutr*, 6:193, 2019.
- 472 [48] María Fernanda Zurita, Paúl A Cárdenas, María Elena Sandoval, María Caridad Peña, Marco For-  
473 nasini, Nancy Flores, Marcia H Monaco, Kirsten Berding, Sharon M Donovan, Thomas Kuntz, Jack A  
474 Gilbert, and Manuel E Baldeón. Analysis of gut microbiome, nutrition and immune status in autism  
475 spectrum disorder: a case-control study in ecuador. *Gut Microbes*, 11(3):453–464, May 2020.
- 476 [49] Zhou Dan, Xuhua Mao, Qisha Liu, Mengchen Guo, Yaoyao Zhuang, Zhi Liu, Kun Chen, Junyu Chen,  
477 Rui Xu, Junming Tang, Lianhong Qin, Bing Gu, Kangjian Liu, Chuan Su, Faming Zhang, Yankai Xia,  
478 Zhibin Hu, and Xingyin Liu. Altered gut microbial profile is associated with abnormal metabolism  
479 activity of autism spectrum disorder. *Gut Microbes*, 11(5):1246–1267, September 2020.
- 480 [50] Jennifer Fouquier, Nancy Moreno Huizar, Jody Donnelly, Cody Glickman, Dae-Wook Kang, Juan Mal-  
481 donado, Rachel A Jones, Kimberly Johnson, James B Adams, Rosa Krajmalnik-Brown, and Catherine  
482 Lozupone. The gut microbiome in autism: Study-Site effects and longitudinal analysis of behavior  
483 change. *mSystems*, 6(2), April 2021.
- 484 [51] Rong Zou, Fenfen Xu, Yuezhu Wang, Mengmeng Duan, Min Guo, Qiang Zhang, Hongyang Zhao, and  
485 Huajun Zheng. Changes in the gut microbiota of children with autism spectrum disorder. *Autism*  
486 *Res.*, 13(9):1614–1625, September 2020.
- 487 [52] Dae-Wook Kang, James B Adams, Ann C Gregory, Thomas Borody, Lauren Chittick, Alessio Fasano,  
488 Alexander Khoruts, Elizabeth Geis, Juan Maldonado, Sharon McDonough-Means, Elena L Pollard,  
489 Simon Roux, Michael J Sadowsky, Karen Schwarzberg Lipson, Matthew B Sullivan, J Gregory Ca-  
490 poraso, and Rosa Krajmalnik-Brown. Microbiota transfer therapy alters gut ecosystem and improves  
491 gastrointestinal and autism symptoms: an open-label study. *Microbiome*, 5(1):10, January 2017.
- 492 [53] Prjna687773. <https://www.ncbi.nlm.nih.gov/bioproject/PRJNA687773>.
- 493 [54] Chloe X Yap, Anjali K Henders, Gail A Alvares, David L A Wood, Lutz Krause, Gene W Tyson,  
494 Restuadi Restuadi, Leanne Wallace, Tiana McLaren, Narelle K Hansell, Dominique Cleary, Rachel  
495 Grove, Claire Hafekost, Alexis Harun, Helen Holdsworth, Rachel Jellett, Feroza Khan, Lauren P  
496 Lawson, Jodie Leslie, Mira Levis Frenk, Anne Masi, Nisha E Mathew, Melanie Muniandy, Michaela  
497 Nothard, Jessica L Miller, Lorelle Nunn, Gerald Holtmann, Lachlan T Strike, Greig I de Zubicaray,  
498 Paul M Thompson, Katie L McMahan, Margaret J Wright, Peter M Visscher, Paul A Dawson, Cheryl  
499 Dissanayake, Valsamma Eapen, Helen S Heussler, Allan F McRae, Andrew J O Whitehouse, Naomi R  
500 Wray, and Jacob Gratten. Autism-related dietary preferences mediate autism-gut microbiome associ-  
501 ations. *Cell*, November 2021.
- 502 [55] Dae-Wook Kang, Zehra Esra Ilhan, Nancy G Isern, David W Hoyt, Daniel P Howsmon, Michael Shaffer,  
503 Catherine A Lozupone, Juergen Hahn, James B Adams, and Rosa Krajmalnik-Brown. Differences in  
504 fecal microbial metabolites and microbiota of children with autism spectrum disorders. *Anaerobe*,  
505 49:121–131, February 2018.
- 506 [56] A Gonzalez, Y Vázquez-Baeza, J B Pettengill, A Ottesen, D McDonald, and R Knight. Avoiding  
507 pandemic fears in the subway and conquering the platypus. *mSystems*, 1(3), May 2016.
- 508 [57] Simon H Ye, Katherine J Siddle, Daniel J Park, and Pardis C Sabeti. Benchmarking metagenomics  
509 tools for taxonomic classification. *Cell*, 178(4):779–794, August 2019.

- 510 [58] Alexa B R McIntyre, Rachid Ounit, Ebrahim Afshinnekoo, Robert J Prill, Elizabeth Hénaff, Noah  
511 Alexander, Samuel S Minot, David Danko, Jonathan Foox, Sofia Ahsanuddin, Scott Tighe, Nur A  
512 Hasan, Poorani Subramanian, Kelly Moffat, Shawn Levy, Stefano Lonardi, Nick Greenfield, Rita R  
513 Colwell, Gail L Rosen, and Christopher E Mason. Comprehensive benchmarking and ensemble ap-  
514 proaches for metagenomic classifiers. *Genome Biol.*, 18(1):182, September 2017.
- 515 [59] Derrick E Wood and Steven L Salzberg. Kraken: ultrafast metagenomic sequence classification using  
516 exact alignments. *Genome Biol.*, 15(3):R46, March 2014.
- 517 [60] Joshua S Son, Ling J Zheng, Leahana M Rowehl, Xinyu Tian, Yuanhao Zhang, Wei Zhu, Leighann  
518 Litcher-Kelly, Kenneth D Gadow, Grace Gathungu, Charles E Robertson, Diana Ir, Daniel N Frank,  
519 and Ellen Li. Comparison of fecal microbiota in children with autism spectrum disorders and neu-  
520 rotypical siblings in the simons simplex collection. *PLoS One*, 10(10):e0137725, October 2015.
- 521 [61] Maude M David, Christine Tataru, Jena Daniels, Jessey Schwartz, Jessica Keating, Jarrad Hampton-  
522 Marcell, Neil Gottel, Jack A Gilbert, and Dennis P Wall. Children with autism and their typically  
523 developing siblings differ in amplicon sequence variants and predicted functions of Stool-Associated  
524 microbes. *mSystems*, 6(2), April 2021.
- 525 [62] Ewa Pisula and Karolina Ziegart-Sadowska. Broader autism phenotype in siblings of children with  
526 ASD—A review. *Int. J. Mol. Sci.*, 16(6):13217–13258, June 2015.
- 527 [63] Lisa A Croen, Yinge Qian, Paul Ashwood, Julie L Daniels, Daniele Fallin, Diana Schendel, Laura A  
528 Schieve, Alison B Singer, and Ousseny Zerbo. Family history of immune conditions and autism spec-  
529 trum and developmental disorders: Findings from the study to explore early development, 2019.
- 530 [64] Amory Meltzer and Judy Van de Water. The role of the immune system in autism spectrum disorder.  
531 *Neuropsychopharmacology*, 42(1):284–298, January 2017.
- 532 [65] Di Meng, Weishu Zhu, Kriston Ganguli, Hai Ning Shi, and W Allan Walker. Anti-inflammatory effects  
533 of bifidobacterium longum subsp infantis secretions on fetal human enterocytes are mediated by TLR-4  
534 receptors. *Am. J. Physiol. Gastrointest. Liver Physiol.*, 311(4):G744–G753, October 2016.
- 535 [66] Shugui Wang, Lydia Hui Mei Ng, Wai Ling Chow, and Yuan Kun Lee. Infant intestinal enterococcus  
536 faecalis down-regulates inflammatory responses in human intestinal cell lines. *World J. Gastroenterol.*,  
537 14(7):1067–1076, February 2008.
- 538 [67] Adrian Tett, Kun D Huang, Francesco Asnicar, Hannah Fehlner-Peach, Edoardo Pasolli, Nicolai  
539 Karcher, Federica Armanini, Paolo Manghi, Kevin Bonham, Moreno Zolfo, Francesca De Filippis, Cara  
540 Magnabosco, Richard Bonneau, John Lusingu, John Amuasi, Karl Reinhard, Thomas Rattai, Fredrik  
541 Boulund, Lars Engstrand, Albert Zink, Maria Carmen Collado, Dan R Littman, Daniel Eibach, Danilo  
542 Ercolini, Omar Rota-Stabelli, Curtis Huttenhower, Frank Maixner, and Nicola Segata. The prevotella  
543 copri complex comprises four distinct clades underrepresented in westernized populations. *Cell Host  
544 Microbe*, 26(5):666–679.e7, November 2019.
- 545 [68] Zhenda Shi and Andrew T Gewirtz. Together forever: Bacterial-Viral interactions in infection and  
546 immunity. *Viruses*, 10(3), March 2018.
- 547 [69] Ursula Neu and Bernardo A Mainou. Virus interactions with bacteria: Partners in the infectious dance.  
548 *PLoS Pathog.*, 16(2):e1008234, February 2020.
- 549 [70] Luis F Camarillo-Guerrero, Alexandre Almeida, Guillermo Rangel-Pineros, Robert D Finn, and  
550 Trevor D Lawley. Massive expansion of human gut bacteriophage diversity. *Cell*, 184(4):1098–1109.e9,  
551 February 2021.
- 552 [71] Mohammadali Khan Mirzaei and Corinne F Maurice. Ménage à trois in the human gut: interactions  
553 between host, bacteria and phages. *Nat. Rev. Microbiol.*, 15(7):397–408, July 2017.
- 554 [72] Andrey N Shkoporov and Colin Hill. Bacteriophages of the human gut: The “known unknown” of the  
555 microbiome. *Cell Host Microbe*, 25(2):195–209, February 2019.
- 556 [73] Holly A Harris, Yuchan Mou, Gwen C Dieleman, Trudy Voortman, and Pauline W Jansen. Child  
557 autistic traits, food selectivity and diet quality: A Population-Based study. *J. Nutr.*, December 2021.
- 558 [74] Hitoshi Kuwabara, Hidenori Yamasue, Shinsuke Koike, Hideyuki Inoue, Yuki Kawakubo, Miho Kuroda,  
559 Yosuke Takano, Norichika Iwashiro, Tatsunobu Natsubori, Yuta Aoki, Yukiko Kano, and Kiyoto Kasai.  
560 Altered metabolites in the plasma of autism spectrum disorder: a capillary electrophoresis time-of-flight  
561 mass spectroscopy study. *PLoS One*, 8(9):e73814, September 2013.
- 562 [75] Brittany D Needham, Mark D Adame, Gloria Serena, Destanie R Rose, Gregory M Preston, Mary C  
563 Conrad, A Stewart Campbell, David H Donabedian, Alessio Fasano, Paul Ashwood, and Sarkis K  
564 Mazmanian. Plasma and fecal metabolite profiles in autism spectrum disorder. *Biol. Psychiatry*,  
565 89(5):451–462, March 2021.
- 566 [76] Antonio Noto, Vassilios Fanos, Luigi Barberini, Dmitry Grapov, Claudia Fattuoni, Marco Zaffanello,  
567 Andrea Casanova, Gianni Fenu, Andrea De Giacomo, Maria De Angelis, Corrado Moretti, Paola  
568 Papoff, Raffaella Ditunno, and Ruggiero Francavilla. The urinary metabolomics profile of an italian  
569 autistic children population and their unaffected siblings. *J. Matern. Fetal. Neonatal Med.*, 27 Suppl  
570 2:46–52, October 2014.

- 571 [77] Claire Duvall, Sean M Gibbons, Thomas Gurry, Rafael A Irizarry, and Eric J Alm. Meta-analysis  
572 of gut microbiome studies identifies disease-specific and shared responses. *Nat. Commun.*, 8(1):1784,  
573 December 2017.
- 574 [78] Braden T Tierney, Yingxuan Tan, Aleksandar D Kostic, and Chirag J Patel. Gene-level metagenomic  
575 architectures across diseases yield high-resolution microbiome diagnostic indicators. *Nat. Commun.*,  
576 12(1):2907, May 2021.
- 577 [79] Jason Lloyd-Price, Cesar Arze, Ashwin N Ananthakrishnan, Melanie Schirmer, Julian Avila-Pacheco,  
578 Tiffany W Poon, Elizabeth Andrews, Nadim J Ajami, Kevin S Bonham, Colin J Brislawn, David  
579 Casero, Holly Courtney, Antonio Gonzalez, Thomas G Graeber, A Brantley Hall, Kathleen Lake,  
580 Carol J Landers, Himel Mallick, Damian R Plichta, Mahadev Prasad, Gholamali Rahnavaard, Jenny  
581 Sauk, Dmitry Shungin, Yoshiki Vázquez-Baeza, Richard A White, 3rd, IBDMDB Investigators,  
582 Jonathan Braun, Lee A Denson, Janet K Jansson, Rob Knight, Subra Kugathasan, Dermot P B  
583 McGovern, Joseph F Petrosino, Thaddeus S Stappenbeck, Harland S Winter, Clary B Clish, Eric A  
584 Franzosa, Hera Vlamakis, Ramnik J Xavier, and Curtis Huttenhower. Multi-omics of the gut microbial  
585 ecosystem in inflammatory bowel diseases. *Nature*, 569(7758):655–662, May 2019.
- 586 [80] Aleksandar D Kostic, Dirk Gevers, Heli Siljander, Tommi Vatanen, Tuulia Hyötyläinen, Anu-Maaria  
587 Hämäläinen, Aleksandr Peet, Vallo Tillmann, Päivi Pöhö, Ismo Mattila, Harri Lähdesmäki, Eric A  
588 Franzosa, Outi Vaarala, Marcus de Goffau, Hermie Harmsen, Jorma Ilonen, Suvi M Virtanen, Clary B  
589 Clish, Matej Orešič, Curtis Huttenhower, Mikael Knip, DIABIMMUNE Study Group, and Ramnik J  
590 Xavier. The dynamics of the human infant gut microbiome in development and in progression toward  
591 type 1 diabetes. *Cell Host Microbe*, 17(2):260–273, February 2015.
- 592 [81] Finale Doshi-Velez, Paul Avillach, Nathan Palmer, Athos Bousvaros, Yaorong Ge, Kathe Fox, Greg  
593 Steinberg, Claire Spettell, Iver Juster, and Isaac Kohane. Prevalence of inflammatory bowel disease  
594 among patients with autism spectrum disorders. *Inflamm. Bowel Dis.*, 21(10):2281–2288, October  
595 2015.
- 596 [82] Isaac S Kohane, Andrew McMurphy, Griffin Weber, Douglas MacFadden, Leonard Rappaport, Louis  
597 Kunkel, Jonathan Bickel, Nich Wattanasin, Sarah Spence, Shawn Murphy, and Susanne Churchill.  
598 The co-morbidity burden of children and young adults with autism spectrum disorders. *PLoS One*,  
599 7(4):e33224, April 2012.
- 600 [83] Dae-Wook Kang, James B Adams, Devon M Coleman, Elena L Pollard, Juan Maldonado, Sharon  
601 McDonough-Means, J Gregory Caporaso, and Rosa Krajmalnik-Brown. Long-term benefit of micro-  
602 biota transfer therapy on autism symptoms and gut microbiota. *Sci. Rep.*, 9(1):5821, April 2019.
- 603 [84] Valery Danilenko, Andrey Devyatkin, Mariya Marsova, Madina Shibilova, Rustem Ilyasov, and  
604 Vladimir Shmyrev. Common inflammatory mechanisms in COVID-19 and parkinson’s diseases: The  
605 role of microbiome, pharmabiotics and postbiotics in their prevention. *J. Inflamm. Res.*, 14:6349–6381,  
606 November 2021.
- 607 [85] M Čitar, B Hacin, G Tompa, M Štampelj, I Rogelj, J Dolinšek, M Narat, and B Bogovič Matijašić.  
608 Human intestinal mucosa-associated lactobacillus and bifidobacterium strains with probiotic properties  
609 modulate IL-10, IL-6 and IL-12 gene expression in THP-1 cells. *Benef. Microbes*, 6(3):325–336, 2015.
- 610 [86] Kevin R Foster, Jonas Schluter, Katharine Z Coyte, and Seth Rakoff-Nahoum. The evolution of the  
611 host microbiome as an ecosystem on a leash. *Nature*, 548(7665):43–51, August 2017.
- 612 [87] Marcel Van de Wouw, Harriët Schellekens, Timothy G Dinan, and John F Cryan. Microbiota-gut-brain  
613 axis: modulator of host metabolism and appetite. *J. Nutr.*, 147(5):727–745, 2017.
- 614 [88] Juan Miguel Rodríguez, Kiera Murphy, Catherine Stanton, R Paul Ross, Olivia I Kober, Nathalie  
615 Juge, Ekaterina Avershina, Knut Rudi, Arjan Narbad, Maria C Jenmalm, Julian R Marchesi, and  
616 Maria Carmen Collado. The composition of the gut microbiota throughout life, with an emphasis on  
617 early life. *Microb. Ecol. Health Dis.*, 26:26050, February 2015.
- 618 [89] Se Jin Song, Christian Lauber, Elizabeth K Costello, Catherine A Lozupone, Gregory Humphrey,  
619 Donna Berg-Lyons, J Gregory Caporaso, Dan Knights, Jose C Clemente, Sara Nakielnny, Jeffrey I  
620 Gordon, Noah Fierer, and Rob Knight. Cohabiting family members share microbiota with one another  
621 and with their dogs. *Elife*, 2:e00458, April 2013.
- 622 [90] Stelios Georgiades, Peter Szatmari, and Michael Boyle. Importance of studying heterogeneity in autism.  
623 *Neuropsychiatry*, 3(2):123–125, April 2013.
- 624 [91] Brooke C Wilson, Tommi Vatanen, Thilini N Jayasinghe, Karen S W Leong, José G B Derraik, Ben-  
625 jamin B Albert, Valentina Chiavaroli, Darren M Svirskis, Kathryn L Beck, Cathryn A Conlon, Yunnan  
626 Jiang, William Schierding, David J Holland, Wayne S Cutfield, and Justin M O’Sullivan. Strain en-  
627 graftment competition and functional augmentation in a multi-donor fecal microbiota transplantation  
628 trial for obesity. *Microbiome*, 9(1):107, May 2021.
- 629 [92] Christopher S Smillie, Jenny Sauk, Dirk Gevers, Jonathan Friedman, Jaeyun Sung, Ilan Youngster,  
630 Elizabeth L Hohmann, Christopher Staley, Alexander Khoruts, Michael J Sadowsky, Jessica R Alle-  
631 gretti, Mark B Smith, Ramnik J Xavier, and Eric J Alm. Strain tracking reveals the determinants of  
632 bacterial engraftment in the human gut following fecal microbiota transplantation. *Cell Host Microbe*,  
633 23(2):229–240.e5, February 2018.

- 634 [93] TEDDY Study Group. The environmental determinants of diabetes in the young (TEDDY) study:  
635 study design. *Pediatr. Diabetes*, 8(5):286–298, October 2007.
- 636 [94] Jacob T Nearing, André M Comeau, and Morgan G I Langille. Identifying biases and their potential  
637 solutions in human microbiome studies. *Microbiome*, 9(1):113, May 2021.
- 638 [95] Dan Bai, Benjamin Hon Kei Yip, Gayle C Windham, Andre Sourander, Richard Francis, Rinat Yoffe,  
639 Emma Glasson, Behrang Mahjani, Auli Suominen, Helen Leonard, et al. Association of genetic and  
640 environmental factors with autism in a 5-country cohort. *JAMA psychiatry*, 76(10):1035–1043, 2019.
- 641 [96] James T Morton, Sharon Donovan, and Gaspar Taroncher-Oldenburg. Decoupling diet from micro-  
642 biome dynamics results in model mis-specification that implicitly annuls potential associations between  
643 the microbiome and disease phenotypes—ruling out any role of the microbiome in autism (yap et al.  
644 2021) likely a premature c. . . . *bioRxiv*, 2022.
- 645 [97] Bo Yang, Yong Wang, and Pei-Yuan Qian. Sensitivity and correlation of hypervariable regions in 16S  
646 rRNA genes in phylogenetic analysis. *BMC Bioinformatics*, 17:135, March 2016.
- 647 [98] L Palkova, A Tomova, G Repiska, K Babinska, B Bokor, I Mikula, G Minarik, D Ostatnikova, and  
648 K Soltys. Evaluation of 16S rRNA primer sets for characterisation of microbiota in paediatric patients  
649 with autism spectrum disorder. *Sci. Rep.*, 11(1):6781, March 2021.
- 650 [99] William Walters, Embriette R Hyde, Donna Berg-Lyons, Gail Ackermann, Greg Humphrey, Alma  
651 Parada, Jack A Gilbert, Janet K Jansson, J Gregory Caporaso, Jed A Fuhrman, Amy Apprill, and  
652 Rob Knight. Improved bacterial 16S rRNA gene (v4 and v4-5) and fungal internal transcribed spacer  
653 marker gene primers for microbial community surveys. *mSystems*, 1(1), January 2016.
- 654 [100] Christopher Wilks, Shijie C Zheng, Feng Yong Chen, Rone Charles, Brad Solomon, Jonathan P Ling,  
655 Eddie Luidy Imada, David Zhang, Lance Joseph, Jeffrey T Leek, Andrew E Jaffe, Abhinav Nellore,  
656 Leonardo Collado-Torres, Kasper D Hansen, and Ben Langmead. recount3: summaries and queries for  
657 large-scale RNA-seq expression and splicing. May 2021.
- 658 [101] Qiyun Zhu, Shi Huang, Antonio Gonzalez, Imran McGrath, Daniel McDonald, Niina Haiminen, George  
659 Armstrong, Yoshiki Vázquez-Baeza, Julian Yu, Justin Kuczynski, Gregory D Sepich-Poore, Austin D  
660 Swafford, Promi Das, Justin P Shaffer, Franck Lejzerowicz, Pedro Belda-Ferre, Aki S Havulinna,  
661 Guillaume Méric, Teemu Niiranen, Leo Lahti, Veikko Salomaa, Ho-Cheol Kim, Mohit Jain, Michael  
662 Inouye, Jack A Gilbert, and Rob Knight. OGUs enable effective, phylogeny-aware analysis of even  
663 shallow metagenome community structures. April 2021.
- 664 [102] Jethro S Johnson, Daniel J Spakowicz, Bo-Young Hong, Lauren M Petersen, Patrick Demkowicz, Lei  
665 Chen, Shana R Leopold, Blake M Hanson, Hanako O Agresta, Mark Gerstein, et al. Evaluation of  
666 16s rRNA gene sequencing for species and strain-level microbiome analysis. *Nature communications*,  
667 10(1):1–11, 2019.
- 668 [103] Levi Waldron. Data and statistical methods to analyze the human microbiome. *mSystems*, 3(2), March  
669 2018.
- 670 [104] Andrew D Fernandes, Jennifer Ns Reid, Jean M Macklaim, Thomas A McMurrough, David R Edgell,  
671 and Gregory B Gloor. Unifying the analysis of high-throughput sequencing datasets: characterizing  
672 RNA-seq, 16S rRNA gene sequencing and selective growth experiments by compositional data analysis.  
673 *Microbiome*, 2:15, May 2014.
- 674 [105] Mark D Robinson, Davis J McCarthy, and Gordon K Smyth. edgeR: a bioconductor package for  
675 differential expression analysis of digital gene expression data. *Bioinformatics*, 26(1):139–140, January  
676 2010.
- 677 [106] Huang Lin and Shyamal Das Peddada. Analysis of microbial compositions: a review of normalization  
678 and differential abundance analysis. *npj Biofilms and Microbiomes*, 6(1):1–13, December 2020.
- 679 [107] Jyoti Shankar. Insights into study design and statistical analyses in translational microbiome studies.  
680 *Ann Transl Med*, 5(12):249, June 2017.
- 681 [108] P R Rosenbaum and D B Rubin. The bias due to incomplete matching. *Biometrics*, 41(1):103–116,  
682 March 1985.
- 683 [109] Stan Development Team. Stan modeling language users guide and reference manual, 2022.
- 684 [110] Huang Lin and Shyamal Das Peddada. Analysis of compositions of microbiomes with bias correction.  
685 *Nat. Commun.*, 11(1):3514, July 2020.
- 686 [111] James T Morton, Alexander A Aksenov, Louis Felix Nothias, James R Foulds, Robert A Quinn,  
687 Michelle H Badri, Tami L Swenson, Marc W Van Goethem, Trent R Northen, Yoshiki Vázquez-Baeza,  
688 Mingxun Wang, Nicholas A Bokulich, Aaron Watters, Se Jin Song, Richard Bonneau, Pieter C Dor-  
689 restein, and Rob Knight. Learning representations of microbe–metabolite interactions. *Nat. Methods*,  
690 16(12):1306–1314, November 2019.
- 691 [112] James T Morton, Jon Sanders, Robert A Quinn, Daniel McDonald, Antonio Gonzalez, Yoshiki  
692 Vázquez-Baeza, Jose A Navas-Molina, Se Jin Song, Jessica L Metcalf, Embriette R Hyde, et al. Balance  
693 trees reveal microbial niche differentiation. *MSystems*, 2(1):e00162–16, 2017.

- 694 [113] John D Hunter. Matplotlib: A 2d graphics environment. *Computing in science & engineering*, 9(3):90–  
695 95, 2007.
- 696 [114] Michael L. Waskom. seaborn: statistical data visualization. *Journal of Open Source Software*,  
697 6(6):3021, 2021.
- 698 [115] Pauli Virtanen, Ralf Gommers, Travis E Oliphant, Matt Haberland, Tyler Reddy, David Cournapeau,  
699 Evgeni Burovski, Pearu Peterson, Warren Weckesser, Jonathan Bright, et al. Scipy 1.0: fundamental  
700 algorithms for scientific computing in python. *Nature methods*, 17(3):261–272, 2020.
- 701 [116] Charles R Harris, K Jarrod Millman, Stéfán J van der Walt, Ralf Gommers, Pauli Virtanen, David  
702 Cournapeau, Eric Wieser, Julian Taylor, Sebastian Berg, Nathaniel J Smith, et al. Array programming  
703 with numpy. *arXiv preprint arXiv:2006.10256*, 2020.
- 704 [117] S. Hoyer and J. Hamman. xarray: N-D labeled arrays and datasets in Python. *In revision, J. Open  
705 Res. Software*, 2017.
- 706 [118] Ravin Kumar, Colin Carroll, Ari Hartikainen, and Osvaldo Antonio Martín. Arviz a unified library  
707 for exploratory analysis of bayesian models in python. 2019.
- 708 [119] Fabian Pedregosa, Gaël Varoquaux, Alexandre Gramfort, Vincent Michel, Bertrand Thirion, Olivier  
709 Grisel, Mathieu Blondel, Peter Prettenhofer, Ron Weiss, Vincent Dubourg, et al. Scikit-learn: Machine  
710 learning in python. *the Journal of machine Learning research*, 12:2825–2830, 2011.
- 711 [120] Daniel McDonald, Jose C Clemente, Justin Kuczynski, Jai Ram Rideout, Jesse Stombaugh, Doug  
712 Wendel, Andreas Wilke, Susan Huse, John Hufnagle, Folker Meyer, et al. The biological observation  
713 matrix (biom) format or: how i learned to stop worrying and love the ome-ome. *Gigascience*, 1(1):2047–  
714 217X, 2012.
- 715 [121] The scikit-bio development team. scikit-bio: A bioinformatics library for data scientists, students, and  
716 developers, 2020.
- 717 [122] Thomas P Quinn, Ionas Erb, Greg Gloor, Cedric Notredame, Mark F Richardson, and Tamsyn M  
718 Crowley. A field guide for the compositional analysis of any-omics data.
- 719 [123] Michelle Pistner Nixon, Jeffrey Letourneau, Lawrence David, Sayan Mukherjee, and Justin D Silver-  
720 man. A statistical analysis of compositional surveys. January 2022.
- 721 [124] Rasko Leinonen, Hideaki Sugawara, Martin Shumway, and International Nucleotide Sequence Database  
722 Collaboration. The sequence read archive. *Nucleic Acids Res.*, 39(suppl\_1):D19–D21, 2010.
- 723 [125] Kalen Cantrell, Marcus W. Fedarko, Gibraan Rahman, Daniel McDonald, Yimeng Yang, Thant Zaw,  
724 Antonio Gonzalez, Stefan Janssen, Mehrbod Estaki, Niina Haiminen, Kristen L. Beck, Qiyun Zhu,  
725 Erfan Sayyari, James T. Morton, George Armstrong, Anupriya Tripathi, Julia M. Gauglitz, Clarisse  
726 Marotz, Nathaniel L. Matteson, Cameron Martino, Jon G. Sanders, Anna Paola Carrieri, Se Jin Song,  
727 Austin D. Swafford, Pieter C. Dorrestein, Kristian G. Andersen, Laxmi Parida, Ho-Cheol Kim, Yoshiaki  
728 Vázquez-Baeza, and Rob Knight. Empress enables tree-guided, interactive, and exploratory analyses  
729 of multi-omic data sets. *mSystems*, 6(2), 2021.

## 730 Methods

### 731 Search strategy and inclusion criteria

732

733 We performed a systematic search for published and/or publicly deposited or not yet published and/or  
734 publicly available human microbiome, metabolome, immunome, transcriptome AND autism/ASD datasets  
735 in several NCBI databases (PubMed, SRA, and BioProject), UCSD’s MassIVE resource, the PsychENCODE  
736 consortium, the American Gut Project, and from individual research groups worldwide. About half of 70+  
737 studies we identified were already deposited on public data repositories or were made directly available to  
738 us by the research groups.

739 Most studies consisted of heterogenous—no genotype or phenotype stratification—ASD and neurotypical  
740 age- and sex-matched cohorts and had one or two datasets (microbiome [16S, shotgun metagenomic se-  
741 quencing (SMS)], metabolome [urine/serum/fecal], immunome [cytokines], transcriptome [RNAseq], dietary  
742 survey, behavioral survey) associated with them, with only a few studies having three or more omic datasets  
743 associated with them (Table 1). We adopted a multi-cohort and multi-omics meta-analysis framework that  
744 allowed us to combine independent and dependent omic data sets in one overall analysis[43, 44]. In total,  
745 we analyzed 597 ASD-control pairs. To reduce the batch effects and noise associated with primer choice in  
746 the 16S datasets, a major confounder in microbiome analyses, we restricted the 16S datasets to include only  
747 those targeting the variable region V4 of the bacterial ribosomal RNA, a region exhibiting higher hetero-  
748 geneity and lower evolution rates than other variable regions[97, 98, 99]. Our analysis included 16S datasets  
749 obtained targeting the V4 region exclusively, the V3-V4 region, or the V4-V5 region.

750 The final metabolomic meta-analysis we present here consists of the combined analysis of only four  
751 independently preprocessed, normalized, and analyzed metabolomic datasets. Despite several more ASD-  
752 related datasets being available, the disparity in mass spectrometric technologies used to generate them,  
753 which results in the detection of different subsets of metabolites, precluded their side-by-side comparison  
754 (Table 1). For example, targeted mass spectrometry enables the precise determination of concentrations for

755 a finite number of metabolites, whereas untargeted mass spectrometry detects up to two or three orders of  
756 magnitude more metabolites but is compositional in nature and thus does not yield absolute abundances.  
757 Furthermore, batch effects due to sample-processing such as differences in reagents, sample storage and  
758 mass-spectrometry instruments can introduce unwanted variation in both the abundances and the detected  
759 molecular features [26]. One additional obstacle we encountered was the proprietary nature of many of the  
760 metabolomic datasets that made it impossible to access the raw data and run standardized workflows.

761 Of the 40 transcriptomic datasets that were available in recount3 [100], the vast majority were obtained  
762 from studies with model animals, and only four of them had been obtained from postmortem processing  
763 of brain samples from autistic and neurotypical individuals. These four datasets collected different brain  
764 tissue types, including from the amygdala, the prefrontal cortex, the anterior cingulate and the dorsolateral  
765 prefrontal cortex.

## 766 Data processing

767  
768 16S amplicon and shotgun metagenomics samples were downloaded from the SRA. The 16S amplicon samples  
769 were processed using Deblur and subsequently mapped to bacterial whole genomes captured in the Web of  
770 Life using Woltka[101]. This is done in order to make the amplicon data comparable to shotgun metagenomics  
771 data. Bacterial abundances were extracted from shotgun metagenomics samples using Woltka and Bowtie2.  
772 Viral abundances were extracted from shotgun metagenomics samples using GPD and BWA. RNA expression  
773 data were obtained directly from recount3 [100]; the four metabolomics datasets were provided by the authors.

774 The approach of mapping both 16S amplicon sequences and SMS samples to a common set of microbial  
775 reference genome provided a consistent taxonomic annotation between the different 16S amplicon types and  
776 SMS datasets. However, there are notable limitations in taxonomic resolution in all of these datasets. For  
777 instance, multiple *Bifidobacterium* species that are associated with non-human microbiomes were found in-  
778 cluding *B. asteroides* (honeybee), *B. callitrichos* (marmoset), *B. choerinum* (pig) and *B. sanguine* (tamarin).  
779 We observed that these 16S amplicons were multi-mapped across many different *Bifidobacterium* genomes,  
780 which highlights the lack of species level resolution highlighted in previous studies [102]. Similarly, taxo-  
781 nomic profiles obtained from shotgun sequencing are known to have elevated false positive rates taxonomic  
782 identifications due to high genome similarity between microbial reference genomes [59].

783 To enable age- and sexmatching, a bipartite matching between ASD and neurotypical subjects was  
784 performed using age and sex covariates. Subjects that could not be matched were excluded from the meta-  
785 analysis. Amongst the 16S and SMS datasets, there were multiple longitudinal datasets. To integrate these  
786 datasets into the cross-sectional analysis, we only picked the first time point for each subject.

## 787 Differential ranking analysis

788  
789 One of the most common approaches to evaluating microbiome and other omic studies consists of determining  
790 differences in the abundances of microbial taxa, human metabolites or other omic features between cases and  
791 controls [103]. Such differential abundance analysis is typically performed by computing the log fold changes  
792 between the case and control groups[104, 46, 105]. However, confounders such as sex-, age-, and geography-  
793 related batch effects, compositionality, high-dimensionality, over-dispersion, and sparsity, prevented a reliable  
794 estimation of differential abundances and thus compromised the side-by-side comparison of these differential  
795 abundances across studies in the manner of a traditional meta-analysis [106, 107]. Here, we set out to  
796 overcome these inherent limitations of traditional meta-analyses by developing a generalizable approach  
797 for controlling for select confounders that would help reveal a comprehensive picture of ASD-specific omic  
798 signals.

799 To minimize confounder effects, we developed a Bayesian differential ranking algorithm that used bipar-  
800 tite matching to optimize the age- and sex-based pairing of ASD and control subjects within each dataset.  
801 This approach helped both control for potential age and sex confounders and minimize batch effects such as  
802 sample collection method, sample processing protocol, and geographical provenance [108]. These Bayesian  
803 models were fitted via MCMC using Stan [109]. Conceptually, this allowed us to compute log-fold change  
804 differences of microbes between age- and sex-matched subjects, but because we did not have absolute abun-  
805 dance information we could only estimate this log-fold change up to a constant [31] (Supplemental methods).  
806 To determine if there was a significant difference between the age- and sex-matched pairs, we constructed an  
807 effect size metric utilizing our model’s uncertainty estimation (see Supplemental methods for more details).  
808 To show that this model is relevant for biological data, we built a simulation benchmark using the 16S count  
809 data. Specifically, we fitted the Bayesian model on the 16S cross-sectional cohort, and simulated microbial  
810 counts based on those estimated parameters. We showed that the ground truth log-fold changes across all  
811 of the microbes are within the 95% credible intervals estimated by our algorithm. When we evaluated our  
812 Bayesian model fit on the 16S, SMS and RNAseq datasets, our models fits achieved  $R_{hat}$  values below 1.1  
813 and ESS values above 300, indicating that the draws from the posterior distribution are reliable [109].

814 To identify microbes that were ASD-specific or neurotypical specific, we fitted a Gaussian mixture model  
815 on top of the estimated log-fold changes, binning the taxa into three different groups, those taxa hypothesized  
816 to be more abundant in neurotypical controls, those more abundant in ASD children and those that are  
817 equally prevalent in both groups, or are “neutral”.

818 This strategy was inspired by the work done with ANCOM-BC [110]. The major difference in our ap-  
819 proach compared to ANCOM-BC is that our approach assumes a negative binomial distribution for modeling  
820 counts and allows for Bayesian model uncertainty quantification. The reference frame in the cross-sectional  
821 analysis refers to the average abundance of the microbes that are categorized as neutral in Figure 1a. These  
822 same microbes were used to construct a reference frame in the FMT analysis to standardize all of the time

823 points. The FMT analysis used the same matching strategy, but instead of matching on age and sex, the  
824 matchings were performed on the subjects to compare different time points.

825 The heatmap shown in Figure 1 displayed the log-fold changes for each case-control pair. To do this, a  
826 robust CLR transform was performed and all zeros were imputed to the mean abundance for visualization  
827 purposes. The case-control log-fold changes were computed for each pair as highlighted in Figure S7.

## 828 Other methods

829

830 We fitted Random Forests models on nine 16S datasets and on three SMS datasets. We randomly split the  
831 samples into 90/10 training and test splits, performed a 10-fold cross-validation on the training datasets to  
832 obtain optimal model parameters, and computed predictions on the held-out test dataset. PERMANOVA  
833 with Bray-Curtis distances was used to determine if confounding variation due to household, age and sex  
834 were statistically significant in the sibling cohorts.

835 We used MMvec [111] to perform the diet-microbe co-occurrence analysis. Here, microbes were used to  
836 predict dietary intake. This analysis enabled the estimation of conditional probabilities, namely the probabili-  
837 ty of observing a dietary compound given the microbe was already observed. To estimate these conditional  
838 probabilities, MMvec performs a matrix factorization, identifying the factors that explain the most infor-  
839 mation in these interactions. We compared the MMvec microbial factors against the cross-sectional log-fold  
840 changes. We then compared the MMvec dietary factors against t-statistics that measure the differences in  
841 dietary compounds between ASD and neurotypical children.

842 To identify candidate viral-microbe interactions, we ran MMvec on each of the SMS datasets. We then  
843 pulled out the top co-occurring viral taxa for each microbe that had a conditional log-probability greater  
844 than 1, amounting to 78580 microbe-viral interactions. Then we filtered out the microbe-viral interactions  
845 that were not present in the GPD [70], leaving 31276 microbial-viral interactions.

846 We used Songbird [31] to perform the cytokine-microbe analysis via a multinomial regression that used  
847 the cytokines to predict microbial abundances. We reported biased microbial log-fold changes with respect to  
848 cytokine concentration differences. Pearson correlation was used to determine the agreement between the 16S  
849 cross-sectional microbial differentials and the microbe-cytokine differentials. To directly link these microbial  
850 abundances to the cytokine concentrations, we computed log-ratios, or balances, of microbes for each sample.  
851 For example, for IL-6 the numerator consisted of the top 30 microbes that are estimated to increase the most  
852 in abundance when IL-6 concentration increased, and the denominator consisted of the bottom 30 microbes  
853 which are estimated to be the most decreased when IL-6 concentration increases. Once these partitions are  
854 defined, the balances for each sample are computed by taking the log-ratio of the average abundance of the  
855 numerator group and the denominator group. See Morton et al 2017 for more details behind balances [112].  
856 Pearson correlation between these balances and the cytokine concentrations are then computed to measure  
857 the agreement between the microbial abundances and the cytokine concentrations.

858 To identify key microbial genes, we performed a comparative genomic analysis in which we binned  
859 the microbial genomes into those associated with ASD and those associated with control subjects. Using a  
860 binomial test, we were able to determine if a particular gene was more commonly observed in ASD-associated  
861 microbes than by random chance. Significant microbial genes and RNA transcripts were subsequently  
862 mapped to KEGG pathways. To directly compare the two contrasting omics levels and gauge metabolic  
863 similarity, we retrieved all the molecules involved in both the microbial and human pathways and calculated  
864 their intersection. Since the metabolomics datasets were not directly comparable, we performed Wilcoxon  
865 tests on age- and sex-matched metabolomics samples within each cohort separately. While our analysis  
866 revealed multiple metabolites that were below the 0.05 p-value threshold, none of these metabolites passed  
867 the FDR corrected threshold.

## 868 Software Availability

869

870 Software implementation of our Bayesian age-sex matched differential ranking algorithm can be found at  
871 <https://github.com/flatironinstitute/q2-matchmaker>

872 We want to acknowledge Matplotlib [113], Seaborn [114], Scipy [115], Numpy [116], Xarray [117], Arviz [118],  
873 Scikit-learn [119], biom-format [120] and Scikit-bio [121] for providing the software foundation that this work  
874 was built upon.

875 **Tables and Figures**

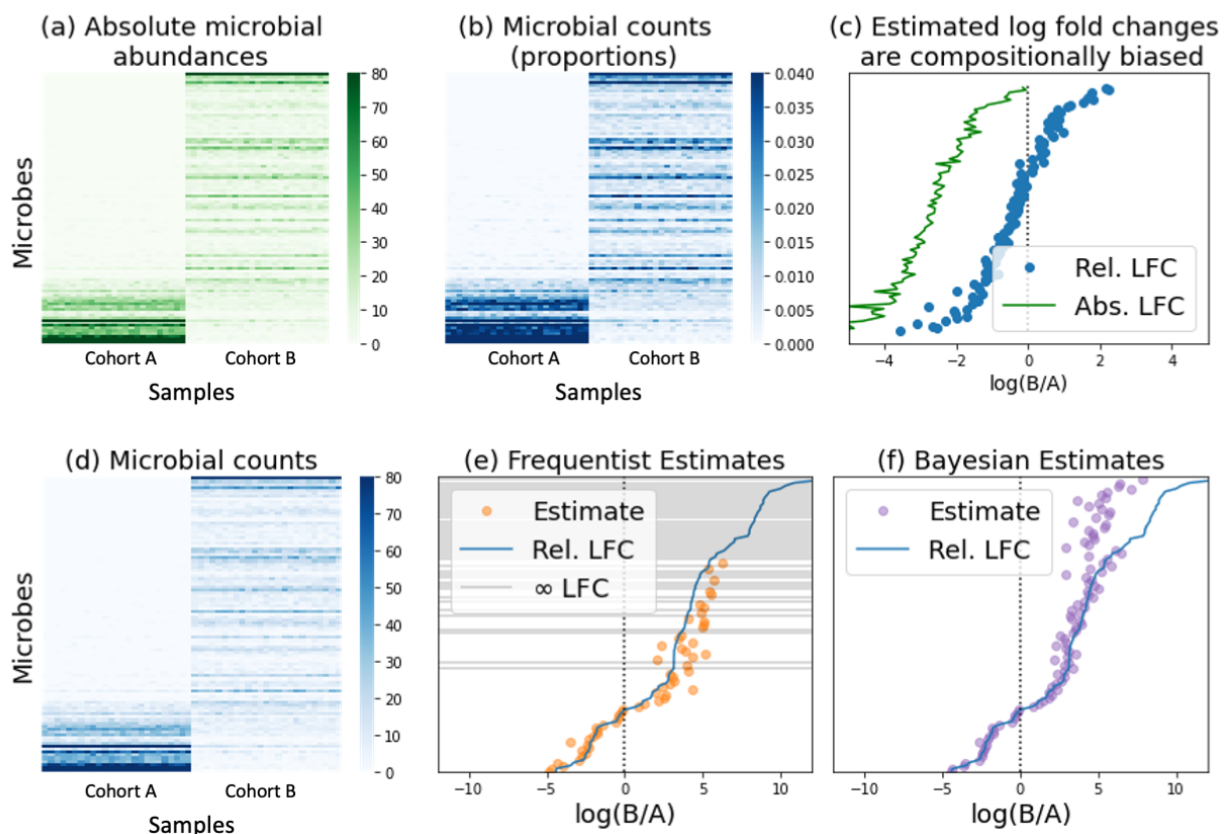

Figure BOX 1: **TACKLING METAGENOMIC UNKNOWNNS**

Metagenomic sequence data present unique quantification challenges due to a lack of total microbial load measurements, which precludes the determination of absolute microbe abundances, and to limitations brought about by sampling and sequencing depth limitations, which result in an incomplete representation of the metagenome. We devised a Bayesian differential ranking algorithm to address both these challenges, the compositional challenge and the zero-inflation challenge.

**The compositional challenge:** Most sequencing count datasets lack absolute abundance information in the form of cells, colony forming units, or transcripts per volume. This limitation preempts the reliable estimation of log fold changes and is a defining characteristic of compositional data that can lead to excessive false positives or false negatives depending on the magnitude of the change in absolute abundances [31, 45]. As illustrated in panels a) through c), microbial counts (a) are typically converted into proportional abundances (b) that are then used to compute log-fold ratios. Fold change calculations adopt the general formula  $\frac{B}{A} = \frac{N_B p_B}{N_A p_A} = \frac{p_B}{p_A} \times \frac{N_B}{N_A}$ , where  $A$  and  $B$  represent the two samples being compared,  $p_A$  and  $p_B$  represent the microbial proportions in  $A$  and  $B$ , and  $N_A$  and  $N_B$  represent the total number of microbes in  $A$  and  $B$ , also known as the ground truth. A key limitation of sequencing count data is their lack of proportionality to the corresponding absolute abundances in the original samples due to sequencing depth constraints [122]. Our inability to observe  $N_A$  and  $N_B$  introduces a bias that ultimately prevents us from performing FDR correction to identify differentially abundant microbes [123]. This bias depends on the change in microbial population size, with large population shifts leading to increased false positive and false negative rates, and an overall skewed representation of the ground truth (c).

**The zero-inflation challenge:** Sampling errors and shallow sequencing lead to disproportionately high numbers of zero counts, especially for microbes present in low abundances (d). Multinomial, Poisson and Negative Binomial distributions have been used to explicitly handle zero counts [46]. However, estimating log-fold differentials remains problematic when microbes are not observed in any of the samples in one group since  $\log 0$  is  $-\infty$  and thus the true log-fold change of a zero-count microbe can not be determined (e). Bayesian inference avoids this problem by introducing a prior that prevents nonsensical log-fold change estimates (f). Specifically, this introduces a rounded-zero assumption whereby all microbes have a non-zero chance of being observed. Panel h highlights what these log-fold changes would look like using a Dirichlet prior, where every microbe has the same probability of being observed before collecting data.



| Organism  | Body type               | Data type            | Num Studies | Num Subject pairs | References                                                                                                                                                                                       |
|-----------|-------------------------|----------------------|-------------|-------------------|--------------------------------------------------------------------------------------------------------------------------------------------------------------------------------------------------|
| Human     | Postmortem brain tissue | RNAseq               | 4           | 49                | (Velmeshev et al. 2019; Wright et al. 2017; Herrero et al. 2020) SRP072713                                                                                                                       |
| Human     | Serum                   | Immune markers       | 1           | 22                | (Zurita et al. 2020)                                                                                                                                                                             |
| Human     | Serum                   | Metabolome           | 2           | 50                | (Needham et al. 2021; Kuwabara et al. 2013)                                                                                                                                                      |
| Human     | Urine                   | Metabolome           | 1           | 26                | (Noto et al. 2014)                                                                                                                                                                               |
| Human     | NA                      | Dietary survey       | 1           | 26                | (Berding and Donovan 2019)                                                                                                                                                                       |
| Human     | NA                      | Behavioral survey    | 1           | 28                | (Kang et al. 2019)                                                                                                                                                                               |
| Microbial | Fecal                   | Metabolome           | 2           | 43                | (Needham et al. 2021; Kang et al. 2018)                                                                                                                                                          |
| Microbial | Fecal                   | 16S amplicon         | 10          | 346               | (Berding and Donovan 2019; Zurita et al. 2020; Dan et al. 2020; J. Zhu et al. 2021; Fouquier et al. 2021; Zou et al. 2020; Kang et al. 2019, 2017; Son et al. 2015; David et al. 2021) SRP299486 |
| Microbial | Fecal                   | Shotgun metagenomics | 3           | 83                | (Averina et al. 2020; M. Wang et al. 2019; Dan et al. 2020)                                                                                                                                      |

Table 1: ASD omic datasets included in this study All sequencing datasets were retrieved from the SRA. [124].

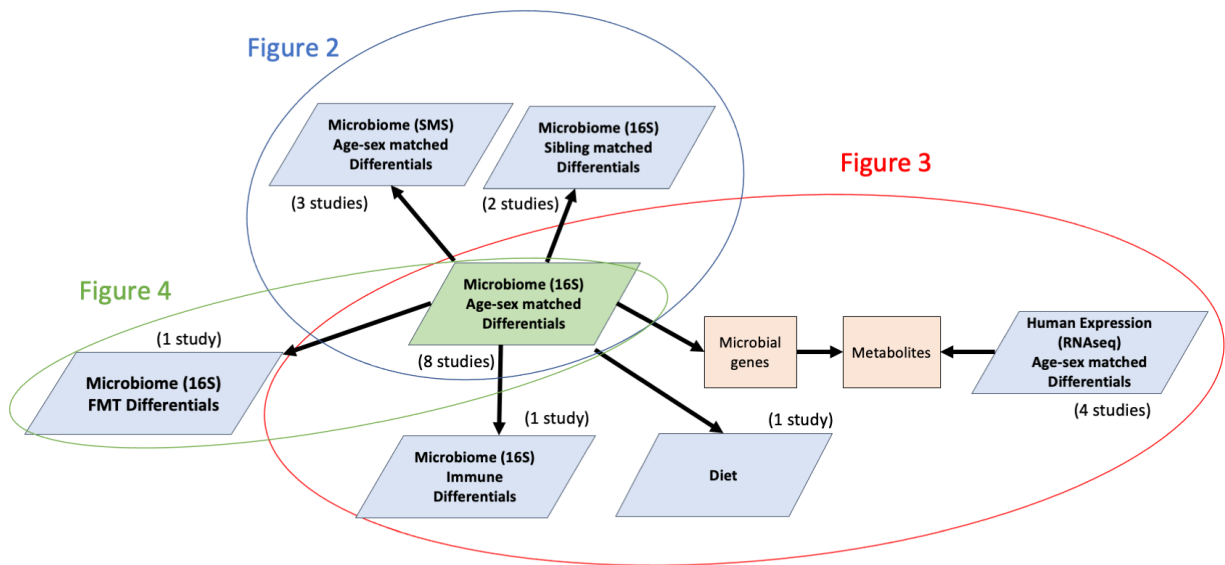

Figure 1: The structure of our meta-analysis across multiple omics levels. For Figure 2, microbial differential abundance on 16S data from age-sex matched cohorts was cross-referenced against sibling matched cohorts and SMS data from other age-sex matched cohorts. For Figure 3, these same 16S microbial differential abundances were cross-referenced against cytokine profiles, dietary surveys and pathways from RNAseq. For Figure 4, the differentially abundant microbes from the age-sex matched analysis was cross-referenced against the Kang et al FMT trial.

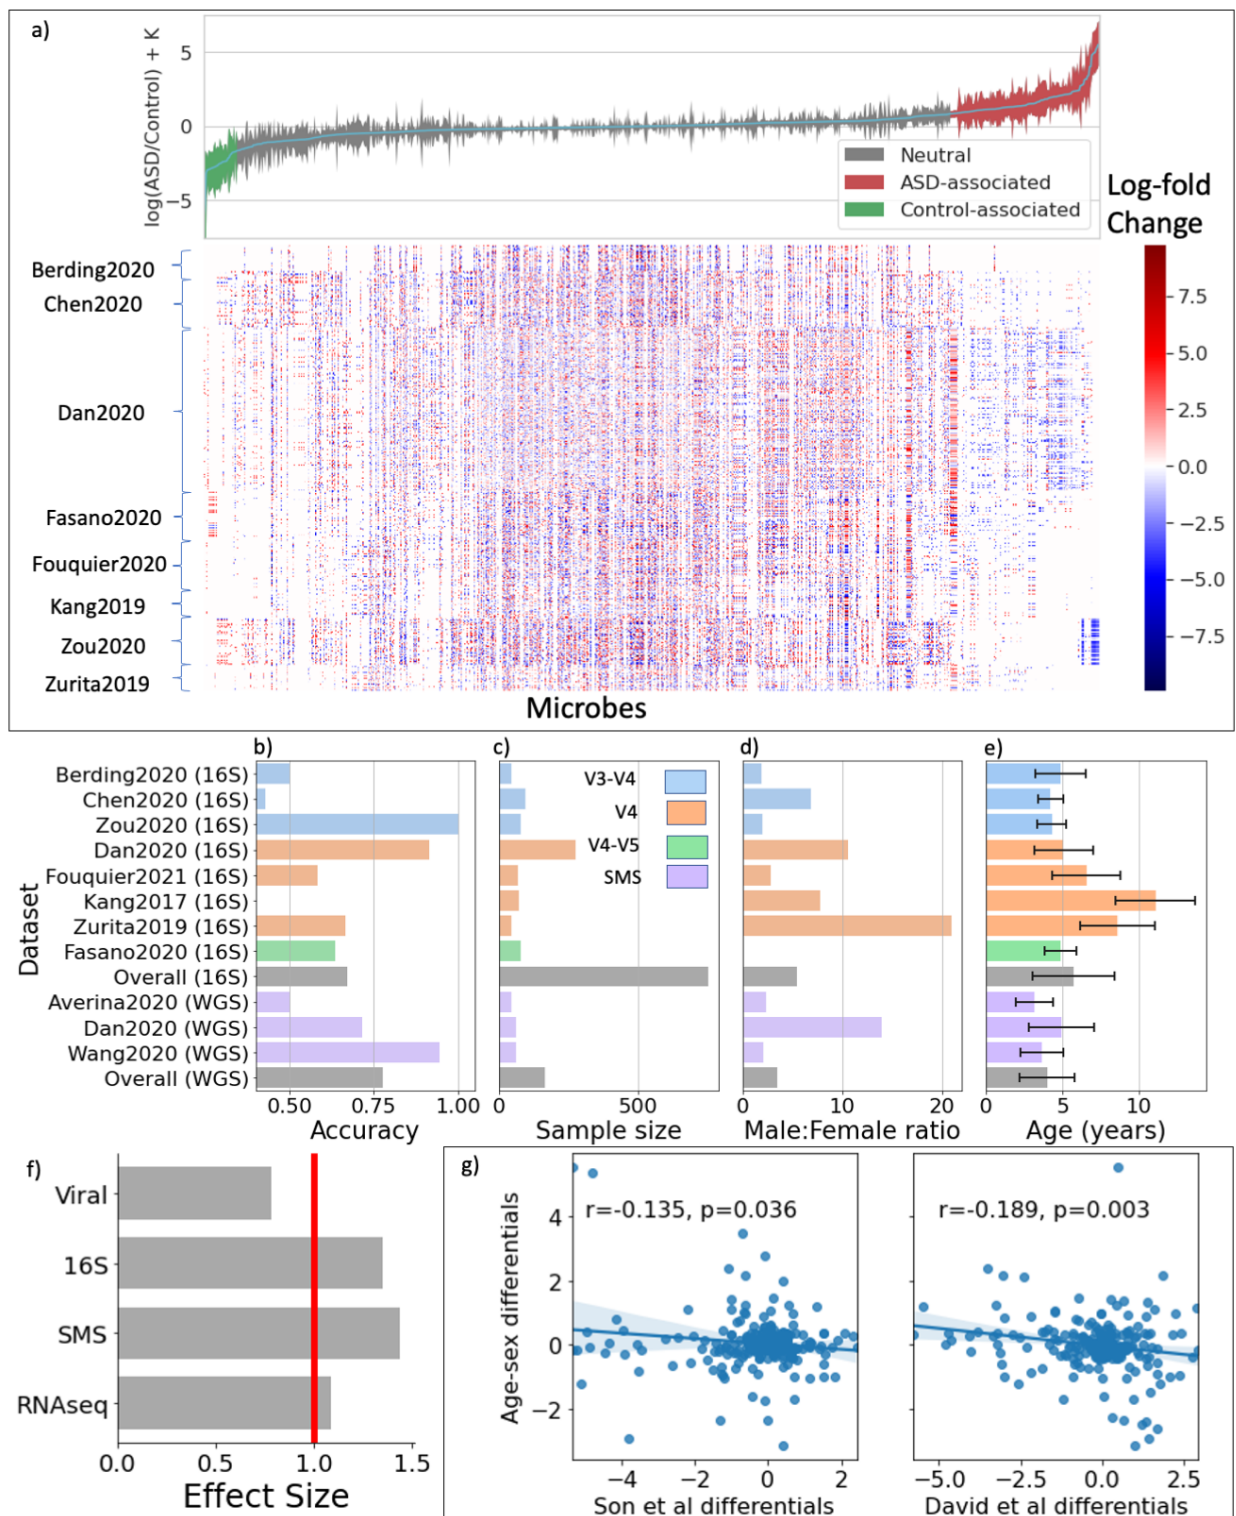

Figure 2: Differential ranking analysis across omics levels. (a) Global microbial 16S log-fold changes between age- and sex-matched ASD and control individuals. Error bars represent the 95% credible intervals. Heatmap showing all CLR transformed microbial differentials for each age- and sex-matched ASD-control pair across all cohorts. (b-e) Held-out random forests ASD classification accuracy, sample size, male:female ratio and age distributions across all 16S and shotgun metagenomics datasets analyzed in this study. V3-V4, V4, and V4-V5 refer to the variable region of the bacterial ribosomal RNA analyzed; SMS refers to shotgun metagenomic sequencing. (f) Effect sizes of different omics levels: viral, 16S, SMS, and RNAseq. (g) Comparisons of sibling-matched differentials from two different studies to the global age- and sex-matched differentials.

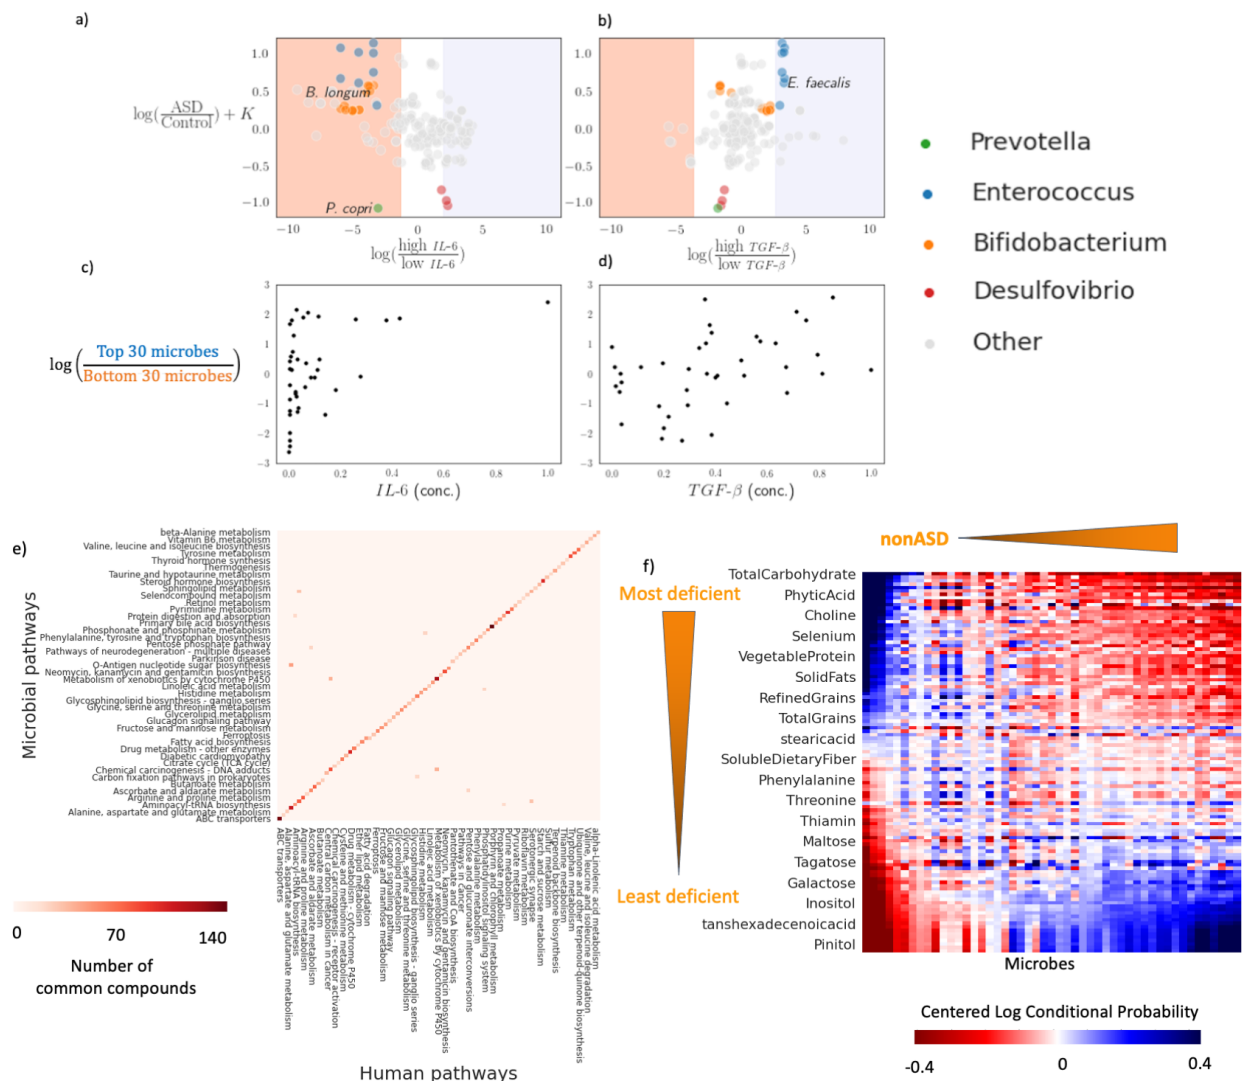

Figure 3: Characterizing the associations between differentially abundant microbes in ASD and cytokines, gene expression in the brain, and dietary patterns. (a-b) Comparison of microbial differentials obtained from age- and sex-matching and cytokine analysis. LFC denotes log-fold change of microbial abundances with respect to a specific cytokine. (c-d) Microbial log-ratios constructed from 30 top and bottom most differentially abundant microbes corresponding to each cytokine. (e) Heatmap showing the overlap of molecules between ASD-enriched pathways in the microbiome and in the brain. (f) Co-occurrence analysis between diet and microbes in ASD.

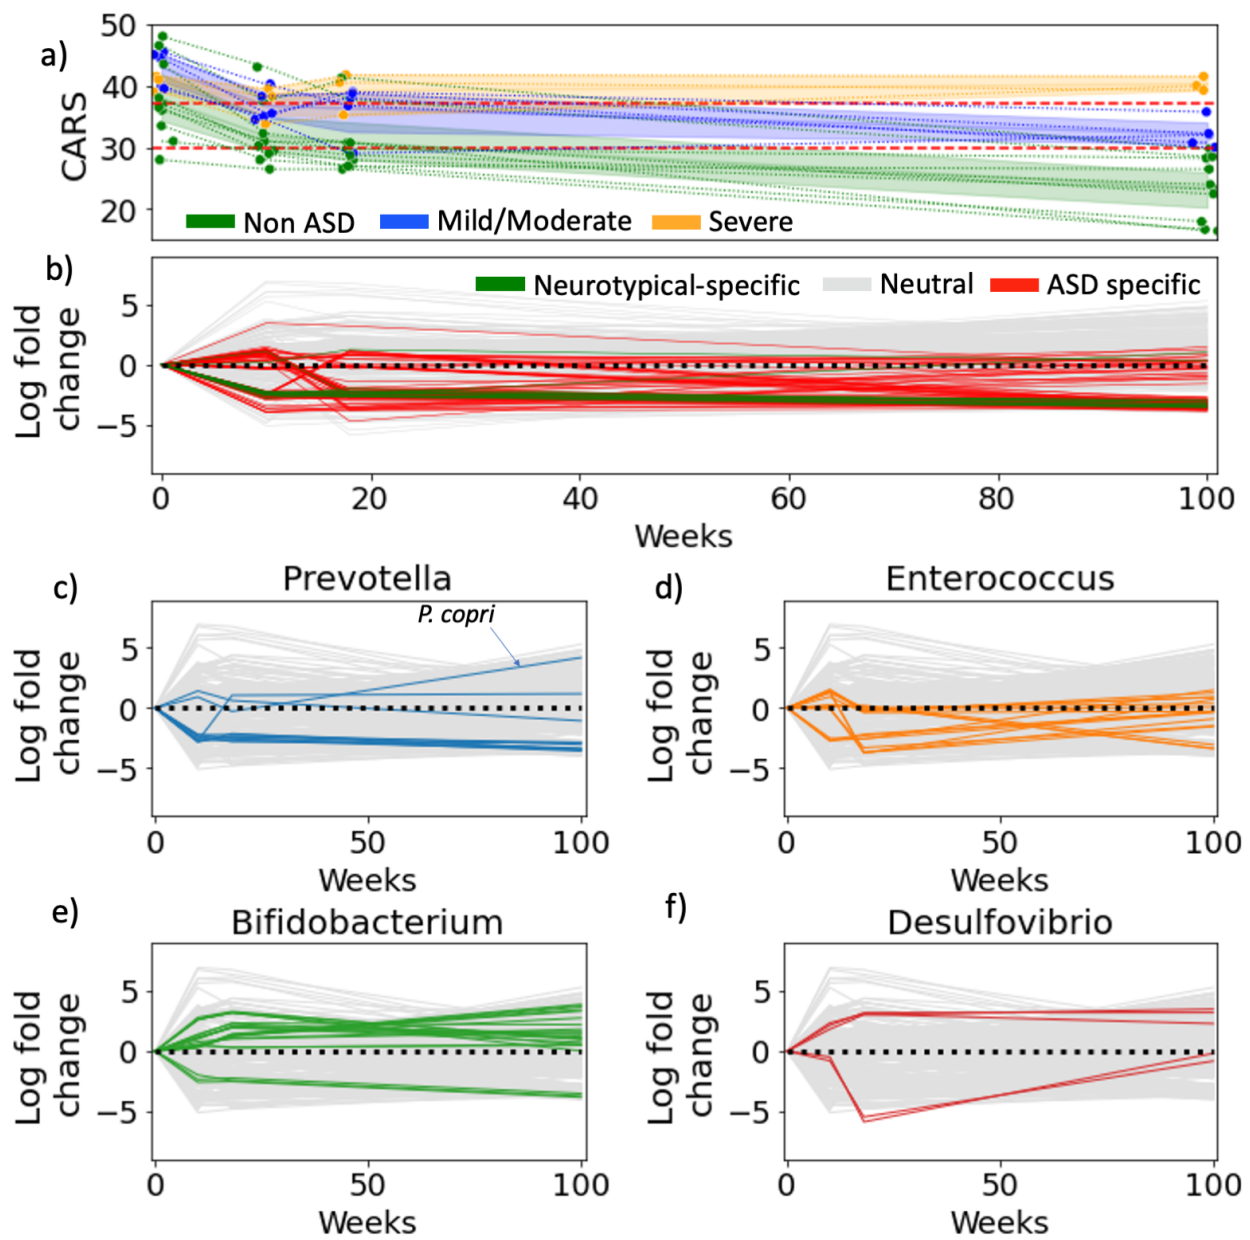

Figure 4: Fecal matter transplants have long-lasting effects on autism gut microbiomes. (a) The improvement of CARS for each ASD child over time. The children are split into 3 groups, non-ASD, mild/moderate and severe based on whether their CARS score fell below 30, between 30-37 or greater than 37 (b) Microbial log-fold changes over time: the time series was generated by calculating log-fold changes between time points for each microbe. ASD-specific microbes highlighted in red were determined in the cross-sectional study. (c-f) Microbial log-fold changes are re-colored with genera highlighted in cytokine comparisons.

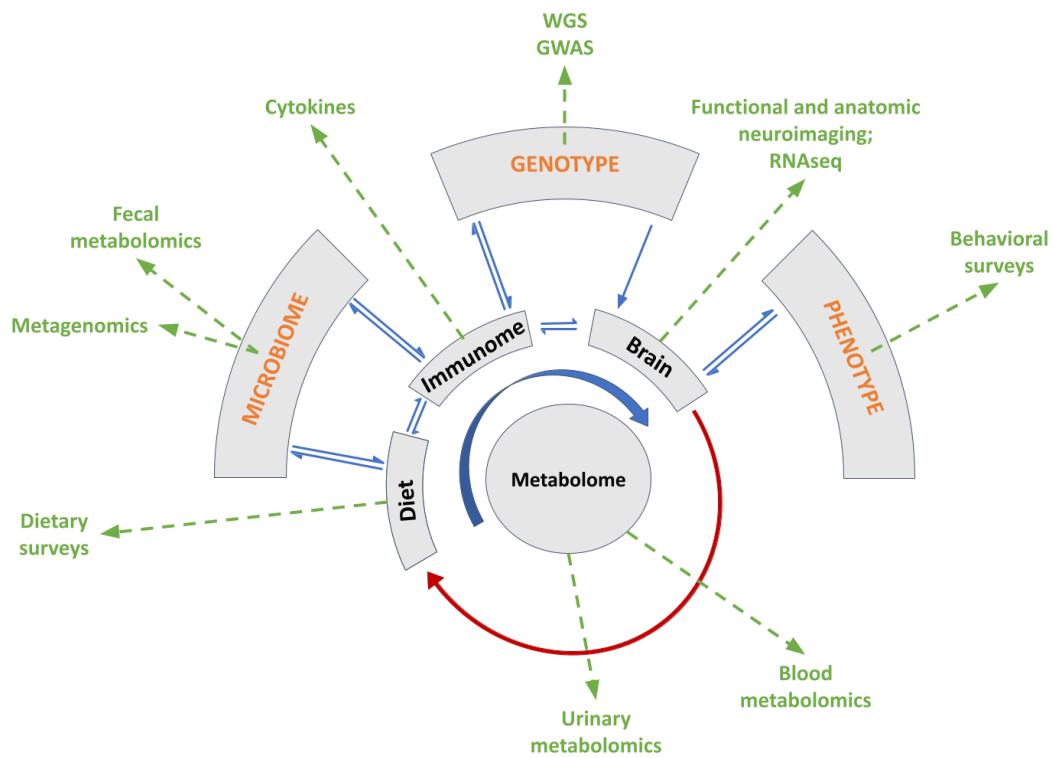

Figure 5: Proposed functional architecture of ASD Hypothesized causal graphs underlying relevant omic levels along the GBA in ASD, and experimental considerations for future studies. Blue arrows denote causal direction, red arrows indicate feedback loops and green arrows indicate measurable data types.

## 876 Supplemental Materials

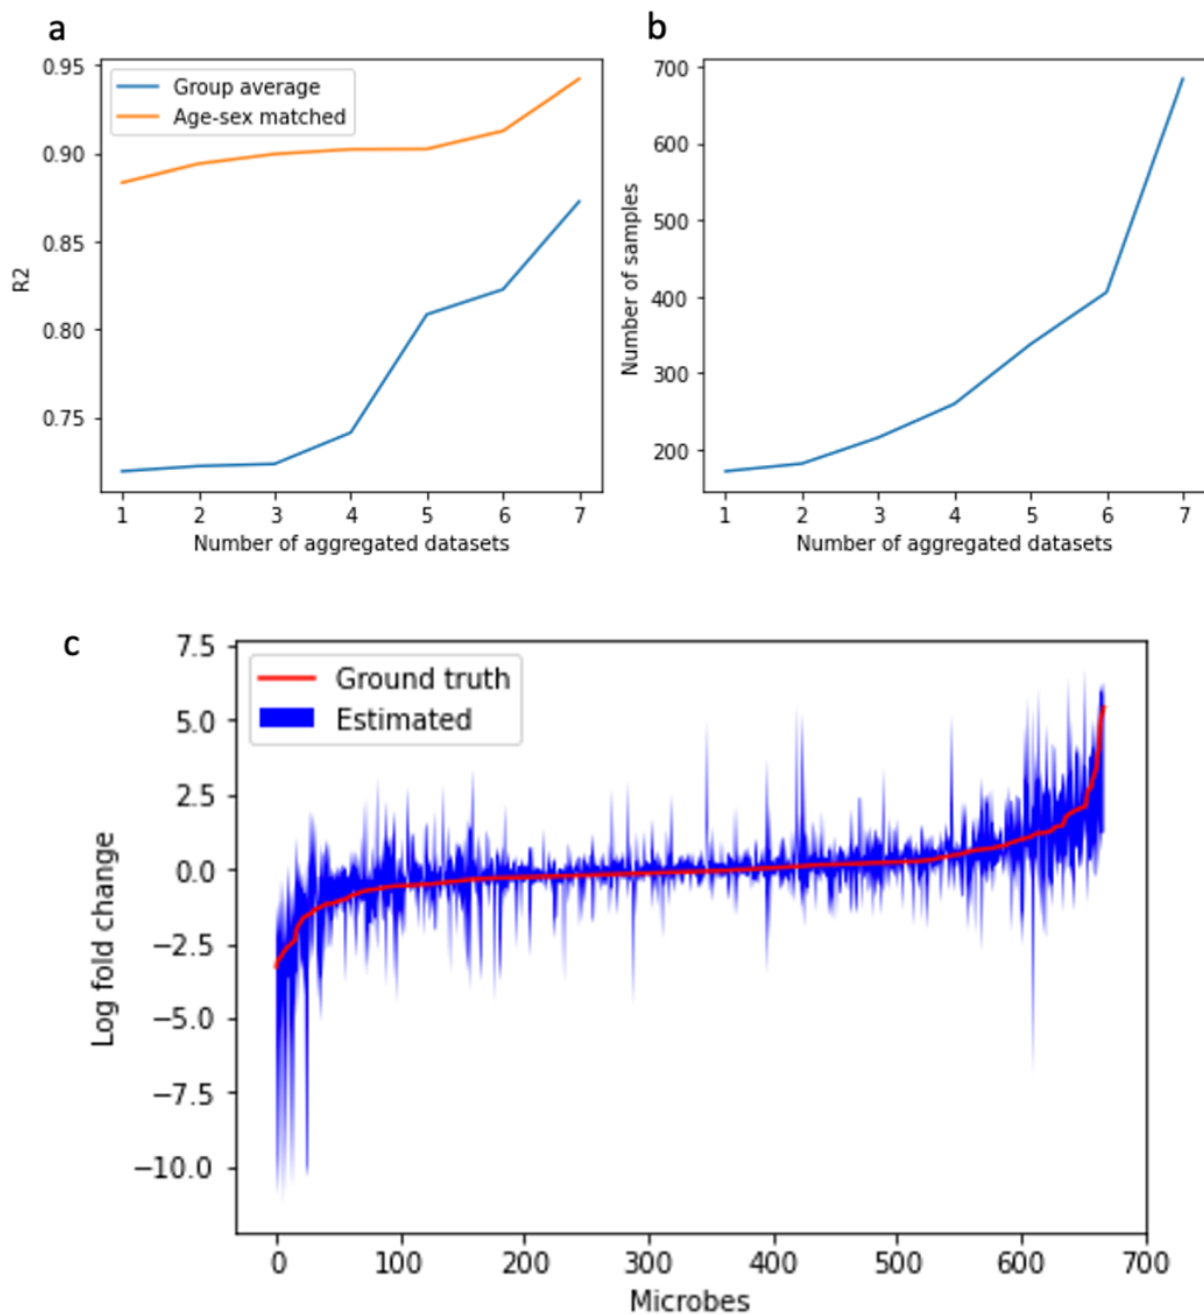

Figure S1: Benchmarks. (a) Comparison of age- and sex-matching approach compared to standard group averaging with respect to dataset size across 7 of the 10 16S studies (excluding Kang et al, David et al and Son et al). (b) Number of samples analyzed. The x-axis represents the number of aggregated datasets, the y-axis on the left panel is the average  $R^2$  metric to measure the model error, and the y-axis on the right panel is the number of samples in the aggregated dataset. (c) Differential abundance estimation derived from a simulated datasets modeled from the cross-sectional cohort from the 8 16S datasets.

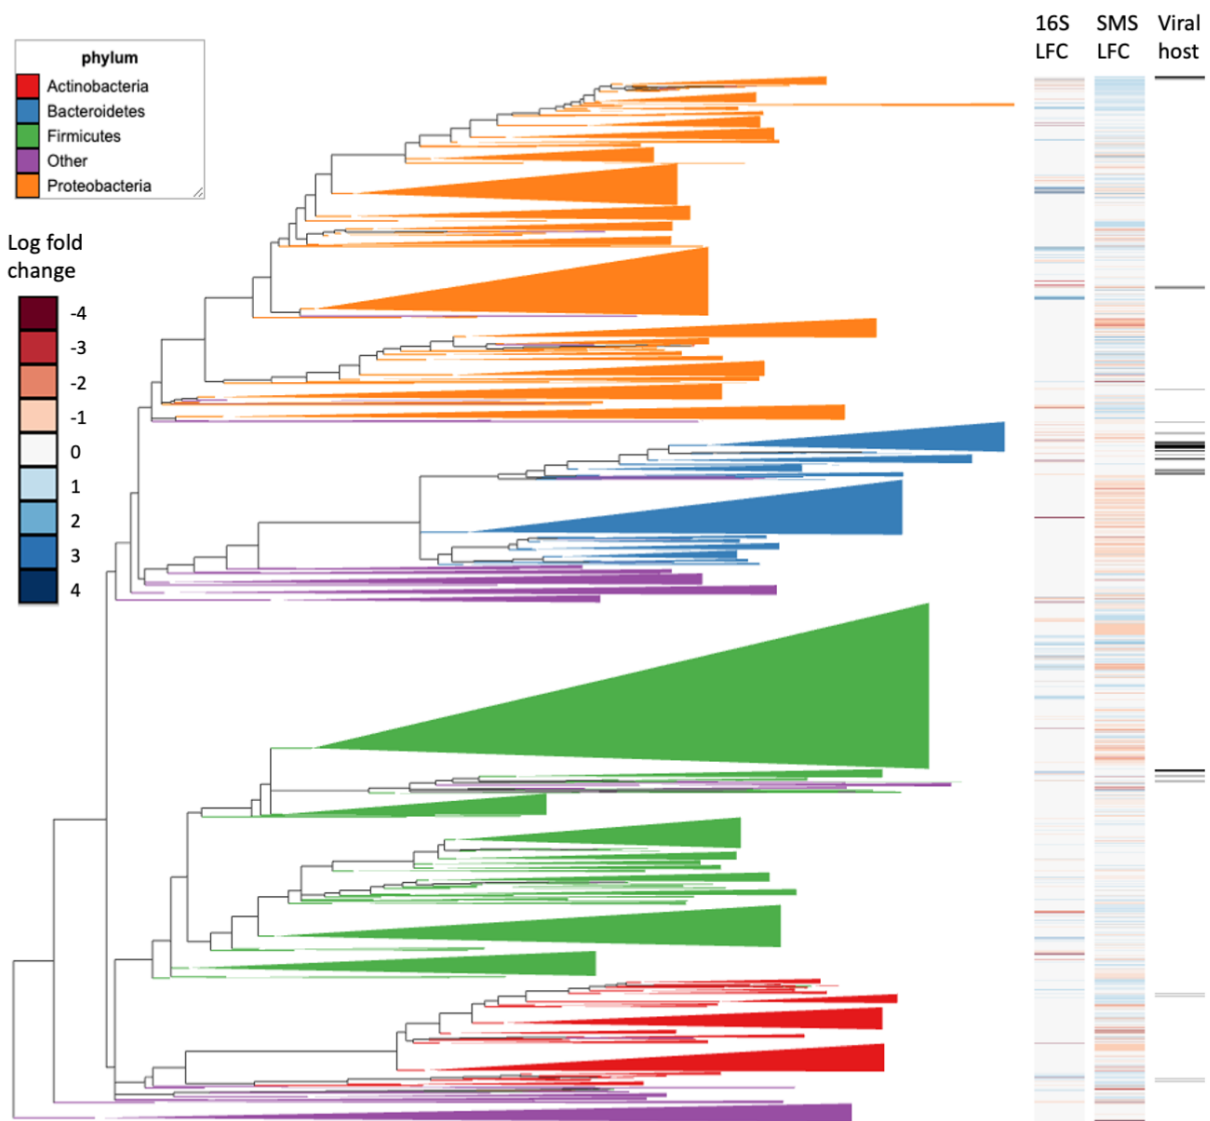

Figure S2: Phylogenetic visualization of microbes with respect to the differentials computed from 16S and SMS differentials. Microbes that were annotated as viral hosts were also highlighted. The phylogenetic visualization was generated using Empress [125].



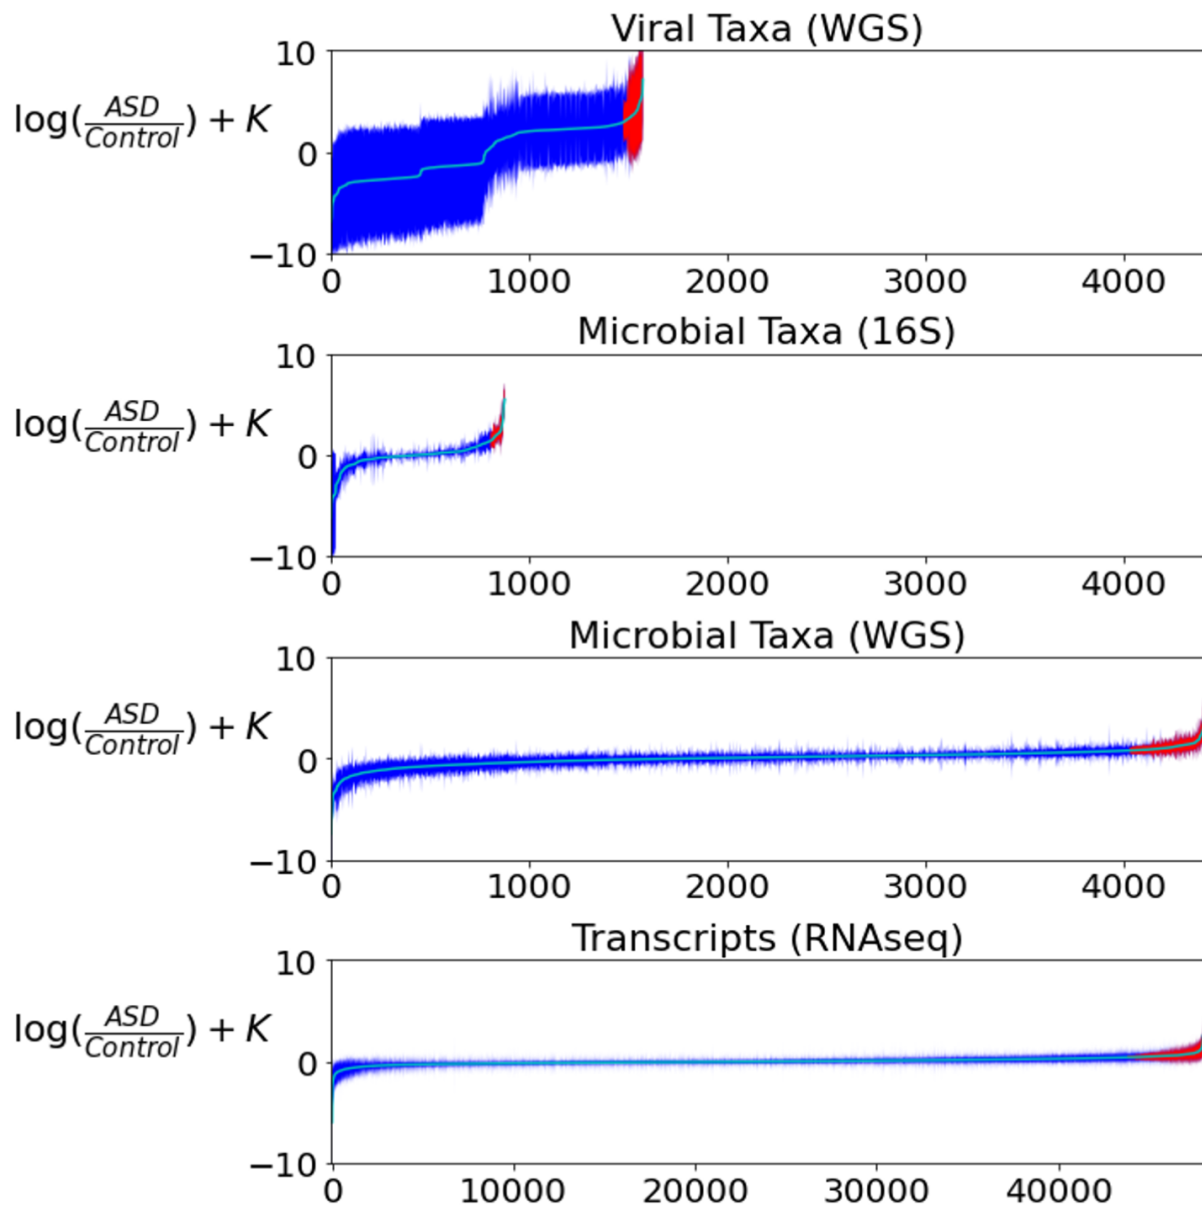

Figure S3: Global differential ranking trends observed for the virome, 16S, SMS, and RNAseq datasets analyzed in this study. The x axis for the virome, 16S and SMS datasets is equivalent to showcase the differences in feature counts; the x axes for the RNAseq dataset is larger by a factor of 10, illustrating the stark difference in number of features of this dataset compared to the other three.

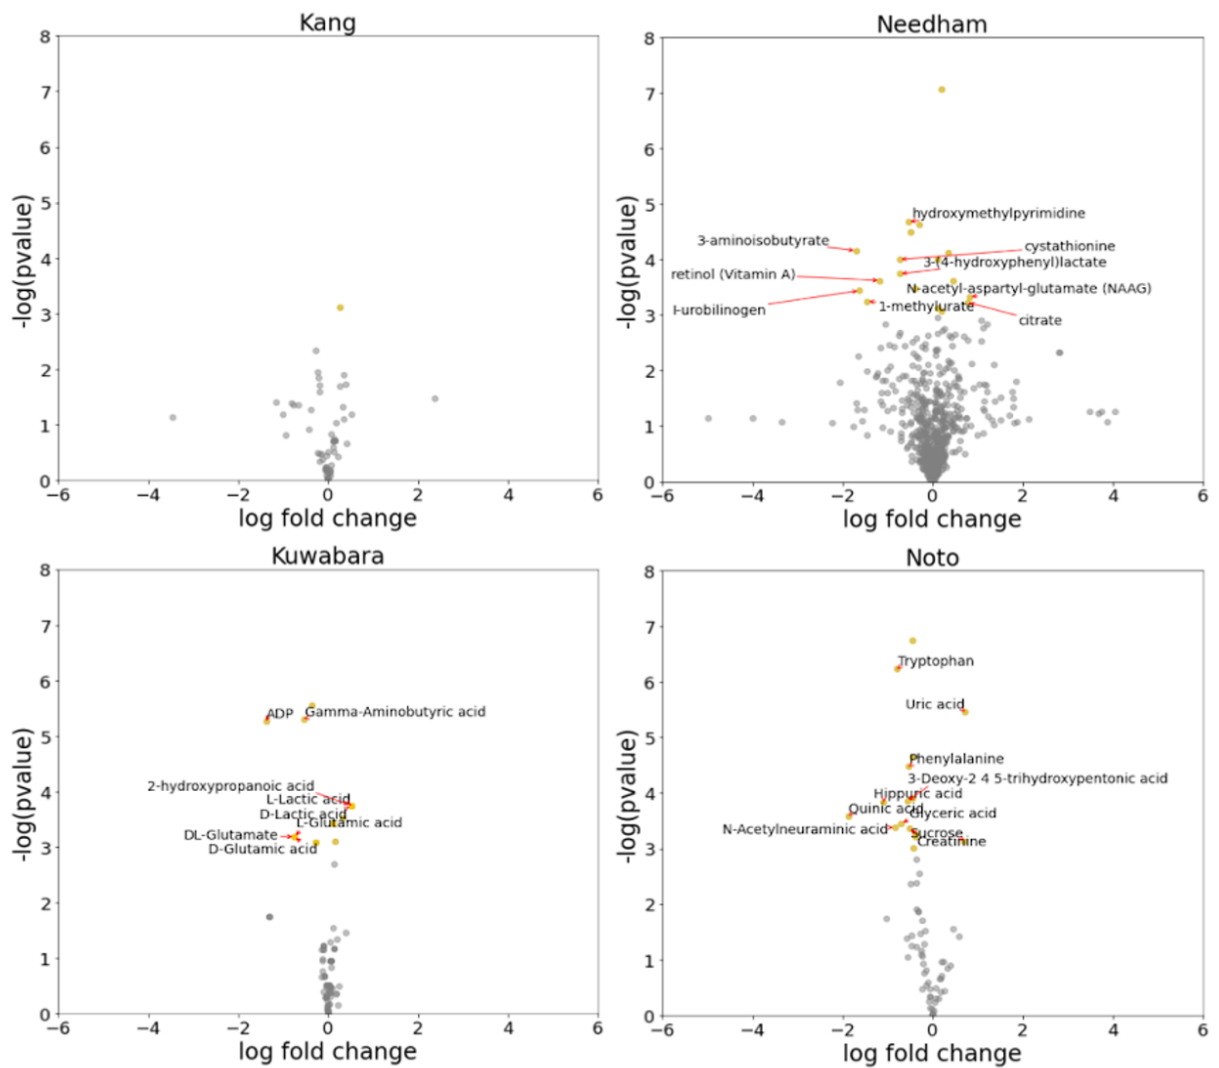

Figure S4: Metabolomics differential ranking analysis across four studies. Paired t-tests were performed to identify differentially abundant metabolites. The metabolites shown in Needham et al consist of both fecal and serum metabolites. None of the metabolites had significant log-fold changes after applying FDR correction.

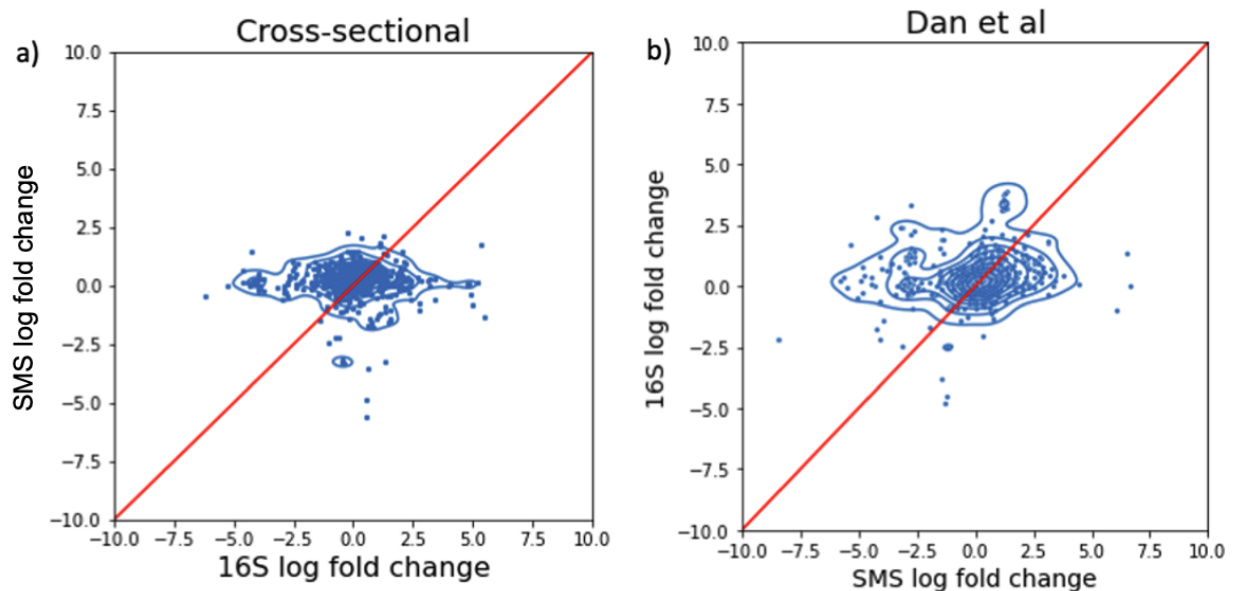

Figure S5: Comparison of log-fold changes computed from 16S and SMS. (a) Comparison of differentials obtained from 16S and SMS on the cross-sectional datasets. (b) Comparison of differentials obtained from 16S and SMS on the same samples from Dan et al.

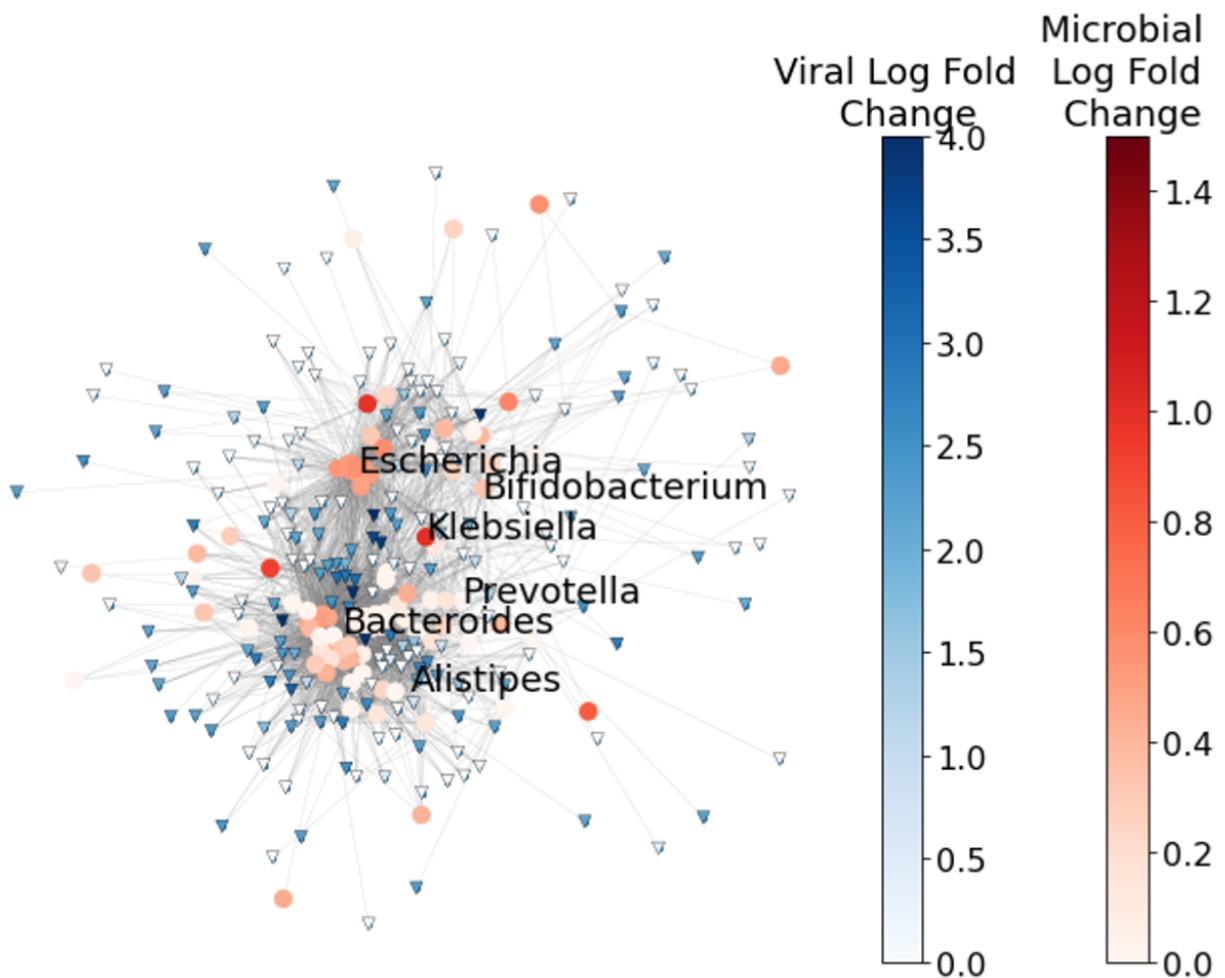

Figure S6: Microbe-viral co-occurrence network estimated using MMvec. Microbes are colored red and viruses are colored blue. Edges are drawn between microbes and viruses if they are highly co-occurring and the interaction was annotated in GPD.

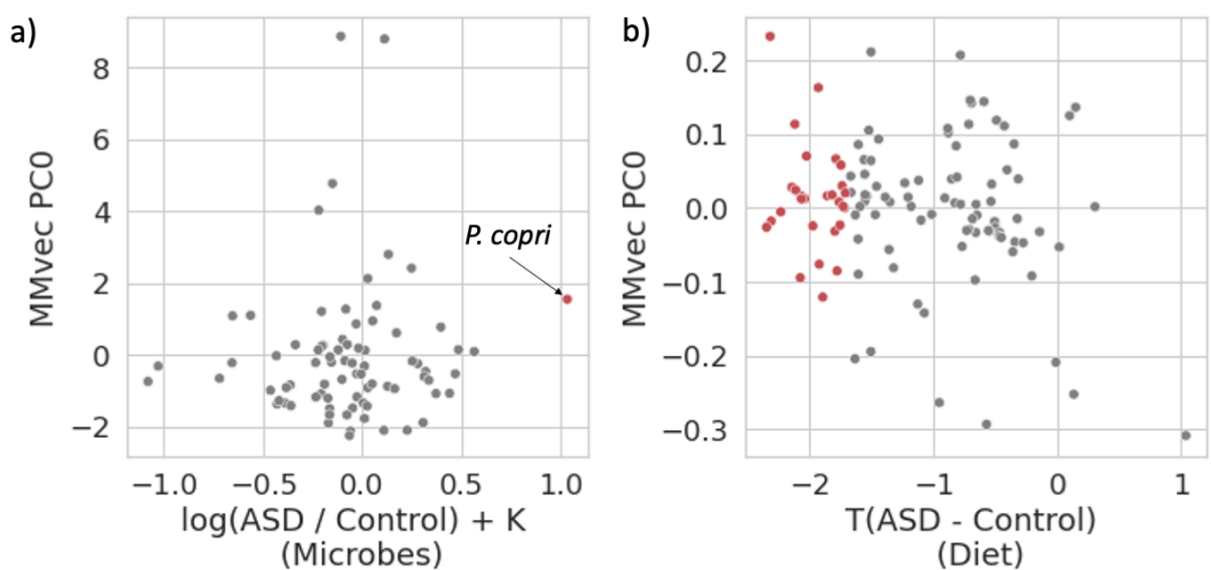

Figure S7: Principal components analysis of microbe-diet interactions. The top principal component explaining the variation in the microbe-diet co-occurrences is compared against the (a) microbial log fold change and (b) dietary differences computed from a t-statistic. Dietary compounds that are significantly significant before FDR correction are highlighted in red.

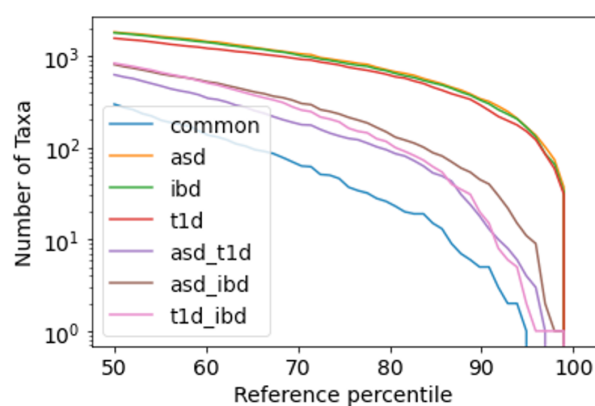

Figure S8: Comorbidity analysis. The number of taxa in common between diseases from differential ranking analysis are shown, with a focus on the intersections between ASD, IBD and T1D.

Table S1: Table of statistics for 16S differentials, including mean log-fold change, standard deviation log fold change, 95% credible intervals and taxonomy for each microbe.

Table S2: Table of statistics for SMS differentials, including mean log-fold change, standard deviation log fold change, 95% credible intervals and taxonomy for each microbe.

Table S3: Table of statistics for RNAseq differentials, including mean log-fold change, standard deviation log fold change, 95% credible intervals and taxonomy for each transcript.

Table S4: Table of statistics for viral differentials, including mean log-fold change, standard deviation log fold change, 95% credible intervals for each virus.

Table S5: Permanova breakdown of sibling matched cohorts looking at the confounding variation due to age, sex and household.

Table S6: Microbial log fold changes due to cytokine differences, including mean log-fold change for each cytokine.

Table S7: Microbe virus co-occurrences, where entries represent the centered log-probability of a microbe and a virus both present for a given sample

Table S8: A list of paired microbe and human pathways in addition to the number of overlapping metabolites

Table S9: Microbe diet co-occurrences, where entries represent the centered log-probability of a microbe and a dietary compound both present for a given subject.

Table S10: Microbial log fold changes between paired time points across all of the subjects in the FMT study.
